# RET as a Diagnostic and Therapeutic Target in Sporadic and Hereditary Endocrine Tumors

Jan Willem B. de Groot, Thera P. Links, John T. M. Plukker, Cornelis J. M. Lips, and Robert M. W. Hofstra

Departments of Endocrinology (J.W.B.d.G., T.P.L.), Surgical Oncology (J.W.B.d.G., J.T.M.P.), and Genetics (R.M.W.H.), University Medical Center Groningen, University of Groningen, 9700 RB Groningen, The Netherlands; and Department of Endocrinology (C.J.M.L.), University Medical Center Utrecht, 3508 GA Utrecht, The Netherlands

The *RET* gene encodes a receptor tyrosine kinase that is expressed in neural crest-derived cell lineages. The RET receptor plays a crucial role in regulating cell proliferation, migration, differentiation, and survival through embryogenesis. Activating mutations in RET lead to the development of several inherited and noninherited diseases. Germline point mutations are found in the cancer syndromes multiple endocrine neoplasia (MEN) type 2, including MEN 2A and 2B, and familial medullary thyroid carcinoma. These syndromes are autosomal dominantly inherited. The identification of mutations associated with these syndromes has led to genetic testing to identify patients at risk for MEN 2 and familial medullary thyroid carcinoma and subsequent implementation of prophylactic thyroidectomy in mutation carriers. In addition, more than 10 somatic rearrangements of *RET* have been iden-

tified from papillary thyroid carcinomas. These mutations, as those found in MEN 2, induce oncogenic activation of the RET tyrosine kinase domain via different mechanisms, making RET an excellent candidate for the design of molecular targeted therapy. Recently, various kinds of therapeutic approaches, such as tyrosine kinase inhibition, gene therapy with dominant negative RET mutants, monoclonal antibodies against oncogene products, and nuclease-resistant aptamers that recognize and inhibit RET have been developed. The use of these strategies in preclinical models has provided evidence that RET is indeed a potential target for selective cancer therapy. However, a clinically useful therapeutic option for treating patients with *RET*-associated cancer is still not available. (*Endocrine Reviews* 27: 535–560, 2006)

- I. Introduction
- II. The *RET* Gene and Protein
- III. RET Activation Mediated by Ligands
  - A. RET as receptor for the glial cell line-derived neurotrophic factor (GDNF) family of ligands
  - B. RET activation by other growth factors
- IV. RET Signaling
  - A. RET docking sites
  - B. Signal transduction pathways
- V. The Role of RET during Development and in Human Diseases
  - A. The role of RET during development
  - B. RET and endocrine tumors
- VI. *RET* Polymorphisms and Haplotypes in Endocrine Tumors
  - A. Papillary thyroid carcinoma
  - B. Multiple endocrine neoplasia type 2 and familial medullary thyroid carcinoma
  - C. Sporadic medullary thyroid carcinoma
  - D. Sporadic pheochromocytoma
- VII. Diagnostic and Therapeutic Implications of the *RET* Genotype in Multiple Endocrine Neoplasia Type 2 and Familial Medullary Thyroid Carcinoma
- VIII. RET as a Therapeutic Target
  - A. Current treatment options for RET-associated endocrine tumors
  - B. Various ways to inhibit RET signaling
  - C. Ligand binding: antagonists and monoclonal antibodies
  - D. Dimerization: inhibitors
  - E. Autophosphorylation: tyrosine kinase inhibitors
  - F. Recruitment of adaptor proteins: phosphatases
  - G. Intracellular signaling: inhibitors
  - H. Internalization and nuclear translocation: antibodies
  - I. Biosynthesis: gene therapeutic and antisense approaches
- IX. Conclusion

## I. Introduction

TYROSINE KINASES ARE involved in the most essential processes of cells, such as the cell cycle, proliferation, differentiation, motility, and survival (1). In several human cancers, key tyrosine kinases are no longer sufficiently controlled. Many tyrosine kinases are constitutively phosphorylated because of tumor-initiating mutations leading to constitutively active signaling proteins (1, 2).

First Published Online July 18, 2006

Abbreviations: AKT, v-akt murine thymoma viral oncogene homolog 1; CCH, C cell hyperplasia; DOK, downstream of kinase; FMTC, familial MTC; GDNF, glial cell line-derived neurotrophic factor; GFL, GDNF family of ligands; GFR $\alpha$ , GDNF-family  $\alpha$  receptors; Grb, growth factor receptor-bound protein; HSCR, Hirschsprung disease; MEN, multiple endocrine neoplasia; MTC, medullary thyroid carcinoma; PDGF, platelet-derived growth factor; PDGFR, PDGF receptor; PI3K, phosphatidylinositol 3-kinase; PLC, phospholipase C; PTC, papillary thyroid carcinoma; RAF, Ras effectors serine/threonine kinase; RET, rearranged during transfection; RNAi, RNA interference; RPI-1, ribose-5-phosphate isomerase; sGFR $\alpha$ , soluble GFR $\alpha$ ; SHANK3, SH3 and multiple ankyrin repeat domains 3; Shc, Src-homology collagen; SNP, single nucleotide polymorphism; Src, v-src sarcoma (Schmidt-Ruppin A-2) viral oncogene homolog; STAT3, signal transducer and activator of transcription 3; VEGF, vascular endothelial growth factor; VEGFR, VEGF receptor.

*Endocrine Reviews* is published by The Endocrine Society (<http://www.endo-society.org>), the foremost professional society serving the endocrine community.

The *RET* gene encodes a receptor tyrosine kinase (RET) that is mainly expressed in precursor cells of the neural crest and urogenital tract. RET is essential for the early development of the sympathetic, parasympathetic, and enteric nervous systems, the kidney, and spermatogenesis (3, 4). Accordingly, inactivating germline *RET* mutations are found to be responsible for the development Hirschsprung disease (HSCR), a congenital absence of enteric neurons in the gastrointestinal tract (5, 6). On the other hand, activating *RET* mutations and rearrangements cause human cancers and cancer syndromes, such as familial medullary thyroid carcinoma (FMTC), multiple endocrine neoplasia (MEN) type 2, and papillary and Hürthle cell thyroid cancer (7–9).

In this review, we will describe the structure and signaling properties of wild-type and mutant RET and its role in human endocrine cancers. Furthermore, we will review the timing of intervention based on genotype and the role of RET as a therapeutic target.

## II. The *RET* Gene and Protein

The *RET* gene was first identified in 1985 by transfection of NIH3T3 cells with human lymphoma DNA. The transformed NIH3T3 cells proved to harbor a fusion gene, which was absent in the original tumor. This fusion gene contained part of a gene that encoded a tyrosine kinase domain, and that gene from which the tyrosine kinase domain was part was thereafter called “REarranged during Transfection” (10). *RET* is localized on 10q11.2, is approximately 55,000 bp in size, and contains 21 exons (11).

RET is a single-pass transmembrane protein. It contains four  $\text{Ca}^{2+}$ -dependent cell adhesion (cadherin)-like domains (to induce and stabilize conformational changes needed for interaction with the ligands and coreceptors) and a juxtamembrane cysteine-rich region (responsible for the tertiary structure and formation of dimers) in the extracellular domain (5, 12). The extracellular domain also contains a number of glycosylation sites (13). The fully glycosylated protein of 170 kDa (also called the mature form of RET) is present on the cell membrane. The immature form of 150 kDa lacks glycosylation and is present only in the endoplasmic reticulum and in the cytoplasm (14). The intracellular region encompasses two tyrosine kinase subdomains (TK1 and TK2) that are involved in the activation of numerous intracellular signal transduction pathways (Fig. 1).

RET is subject to alternative splicing of the 3' region generating three protein isoforms that contain 9 (RET9), 43 (RET43) and 51 (RET51) amino acids in the carboxy-terminal tail downstream from glycine 1063 (15). RET9 and RET51, consisting of 1072 and 1114 amino acids, respectively, are the main isoforms *in vivo* (Fig. 1).

## III. RET Activation Mediated by Ligands

### A. *RET* as receptor for the glial cell line-derived neurotrophic factor (GDNF) family of ligands

Under normal conditions, RET can be activated by a complex of coreceptors and ligands. These belong to two groups of proteins: the GDNF family of ligands (GFLs), including

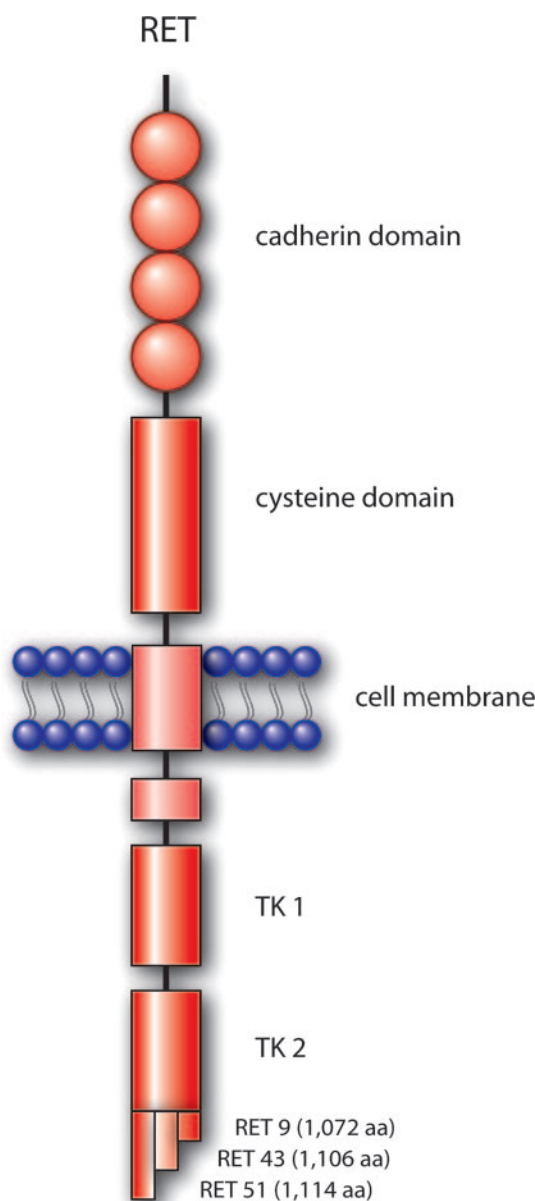

FIG. 1. Schematic representation of the RET tyrosine kinase. The extracellular region comprises four cadherin domains and a cysteine-rich domain. A single transmembrane region spans the cell membrane, and the two tyrosine kinase domains (TK1 and TK2) are located in the intracellular region. The three isoforms of RET are indicated. aa, Amino acids.

neurturin, artemin, and persephin; and the glycosylphosphatidylinositol-anchored GDNF-family  $\alpha$  receptors (GFR $\alpha$ s) (Fig. 2). One of the four GFLs binds to one of the GFR $\alpha$ s (GFR $\alpha$ 1–4) to form a GFR $\alpha$ /GFL complex. GDNF uses GFR $\alpha$ -1 as preferential receptor, neurturin uses GFR $\alpha$ -2, artemin uses GFR $\alpha$ -3, and persephin uses GFR $\alpha$ -4, although there is some cross-specificity (16). Interaction of this GFR $\alpha$ /GFL complex with RET leads to autophosphorylation of tyrosine residues.

Although they are usually bound to the plasma membrane, GFR $\alpha$ s also occur in a soluble form (17). Therefore, RET activation can take place in two ways: in *cis* and in *trans*

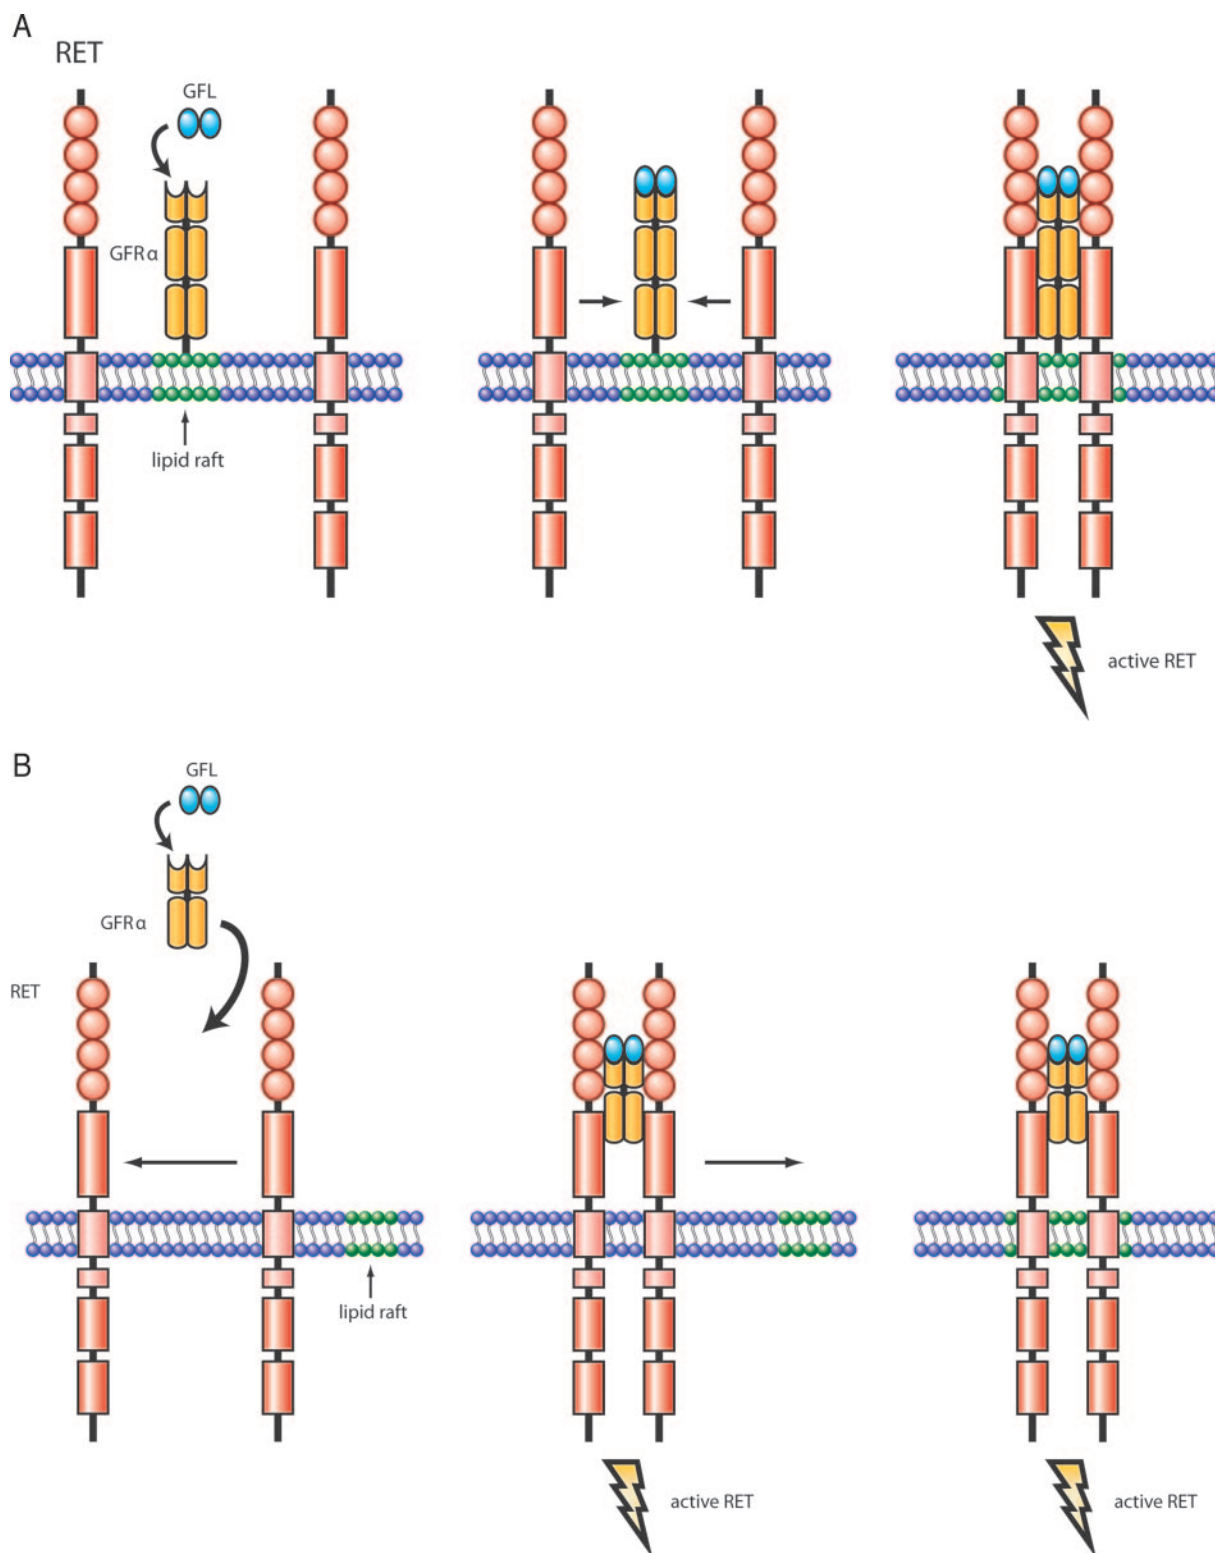

FIG. 2. Different mechanisms of ligand-mediated RET activation. A, RET is activated in *cis* when one of the GDNF family of ligands binds to membrane-bound glycosylphosphatidylinositol-anchored GDNF-family  $\alpha$  coreceptors (GFR $\alpha$ ) that are distributed within lipid rafts. Activation of RET leads to dimerization of RET, which consequently signals to the nucleus. B, RET activation in *trans*: the ligand binds to the soluble form of its coreceptor (sGFR $\alpha$ ) and the ligand-sGFR $\alpha$  complex brings together two inactive RET monomers, initially located outside lipid rafts. Then, the activated RET dimer is recruited to the lipid raft.



(Fig. 2). The *cis* model for RET activation hypothesizes a stepwise assembly of the GFL-receptor complex. The GFL binds to membrane bound GFR $\alpha$ , and subsequently, the GFR $\alpha$ /GFL complex brings together two RET molecules resulting in phosphorylation of tyrosines and intracellular signaling (5, 18–20) (Fig. 2A). The *trans* model of RET activation suggests that the GFL may also bind to the soluble (non-membrane bound) form of the GFR $\alpha$  coreceptors (sGFR $\alpha$ ). The GFL-sGFR $\alpha$  complex then triggers RET activation via dimerization (21, 22).

Membrane-bound GFR $\alpha$ s are known to be located within detergent-insoluble cholesterol-rich domains within the lipid bilayer of the cell membrane, called lipid rafts, which are enriched with signaling proteins (22, 23). These lipid rafts serve as essential signaling compartments in GDNF-stimulated RET signaling and are responsible for cell adhesion and different neuronal processes (21, 24–26).

In its inactive form, RET is located outside the lipid rafts. Upon *cis*-activation, inactive RET is recruited to the lipid rafts by the GFL-GFR $\alpha$  complex (Fig. 2A) and becomes active when associated in the complex within these lipid rafts. This mechanism of activation occurs predominately in cells co-expressing RET and GFR $\alpha$  (24). Because sGFR $\alpha$  is not located within lipid rafts, upon *trans*-activation, RET is already active before it is relocated to lipid rafts (Fig. 2B). This relocation process is slower and more persistent and, remarkably, dependent on the activated state of RET, whereas recruitment of RET to lipid rafts in *cis* is independent of the activation status (21, 22).

It is still poorly known whether other GFLs besides GDNF activate RET both in *cis* and *trans*, but it is likely that the other coreceptors (GFR $\alpha$ 2–4) differ from GFR $\alpha$ 1 regarding the interaction with cell surface proteins (27). All GFR $\alpha$ s induce the phosphorylation of the same tyrosines on the intracellular kinase domains (see Section IV) (28), but they do have specific expression patterns, suggesting that each GFR $\alpha$  has distinct roles in RET activation (19).

#### B. RET activation by other growth factors

Growth factors and their receptors are engaged in a complex network of signals that promote cell growth and differentiation. Although RET is mainly activated by GFLs, other growth factors can activate RET as well. For instance, binding of neurotrophic growth factor to its receptor tyrosine kinase (NTRK1) modulates the phosphorylation of RET51 (and not RET9 or RET43) via an interreceptor kinase signaling mechanism independently of ligands or coreceptors (29), resulting in augmented growth, metabolism, and gene expression.

### IV. RET Signaling

#### A. RET docking sites

RET plays a central role in several intracellular signaling cascades that regulate cellular survival, differentiation, proliferation, migration, and chemotaxis. These pathways are initiated upon RET activation. Specific tyrosine residues, which serve as docking sites for adaptor proteins that link the

signal from the receptor to the main signal transduction pathways, are activated through phosphorylation. At least 18 of these specific phosphorylation sites have been identified, including tyrosine 687 (Y687), serine 696 (S696), Y752, Y791, Y806, Y809, Y826, Y864, Y900, Y905, Y928, Y952, Y981, Y1015, Y1029, Y1062, Y1090, and Y1096. RET9 has only 16 tyrosines in the intracellular domain, whereas Y1090 and Y1096 are present only in the long RET 51 isoform (6, 30–32).

#### B. Signal transduction pathways

A synopsis of signal transduction pathways that are triggered by RET is given below (and in Fig. 3). The pathways triggered by phosphorylation of the different docking sites mentioned above are described below.

GDNF-induced phosphorylation at serine 696 in RET is required for activation of guanine nucleotide exchange factor and lamellipodia formation. Y687 appeared to induce opposite effects on lamellipodia formation. These effects on cytoskeletal rearrangement by activation of RET are regulated via a cAMP/protein kinase A-dependent mechanism (33).

Signal transducer and activator of transcription 3 (STAT3) is a latent transcription factor implicated in several types of cancer when aberrantly activated and an important target of RET through phosphorylation of Y752 and Y928 (34–36).

Y905 interacts with the growth factor receptor-bound protein (Grb) docking proteins 7/10 upon phosphorylation. Phosphorylation of Y905 facilitates autophosphorylation of tyrosine residues located in the C-terminal tail by stabilizing the active conformation of the kinase (37). Y900, Y806, and Y809 probably supplement the function of Y905 (38). The function of the Grb7/10 pathway, however, needs to be further elucidated.

Phosphorylated Y981 constitutes the major binding site of v-src sarcoma (Schmidt-Ruppin A-2) viral oncogene homolog (Src) and therefore the primary residue responsible for Src activation upon RET engagement. Activation of Src is essential to neuronal survival (39). However, it also plays a role in oncogenic RET signaling, and Src is a likely candidate to mediate signaling between RET and focal adhesion kinase (40), an important regulator of tumor formation and cell migration, which is required for the invasion and metastasis of cancer cells (41).

Tyrosine 1015 is a binding site for phospholipase C (PLC)- $\gamma$ , which activates protein kinase C (PKC) enzymes. PKC enzymes, in turn, cause RET phosphorylation but also down-regulate RET and its downstream signaling, thus functioning as a negative feedback loop to modulate RET activity (42). However, when RET activation is prolonged, the PKC-mediated negative feedback loop is down-regulated, leading to cell survival and clonal expansion (43). Furthermore, PLC- $\gamma$  triggers the release of Ca<sup>2+</sup> from intracellular stores via the generation of inositol tris-phosphate (44). Although binding of the RET ligands (45) and RET transport to the cell membrane (46) are dependent on Ca<sup>2+</sup>, the precise effects of RET-induced Ca<sup>2+</sup> influx are not clear yet.

Phosphorylation of Y1062 is crucial for activation of major intracellular signaling pathways, and ablation of Y1062 leads to a considerable decrease in the transforming activity of RET (47). Y1062 is a docking site for various adaptor proteins,

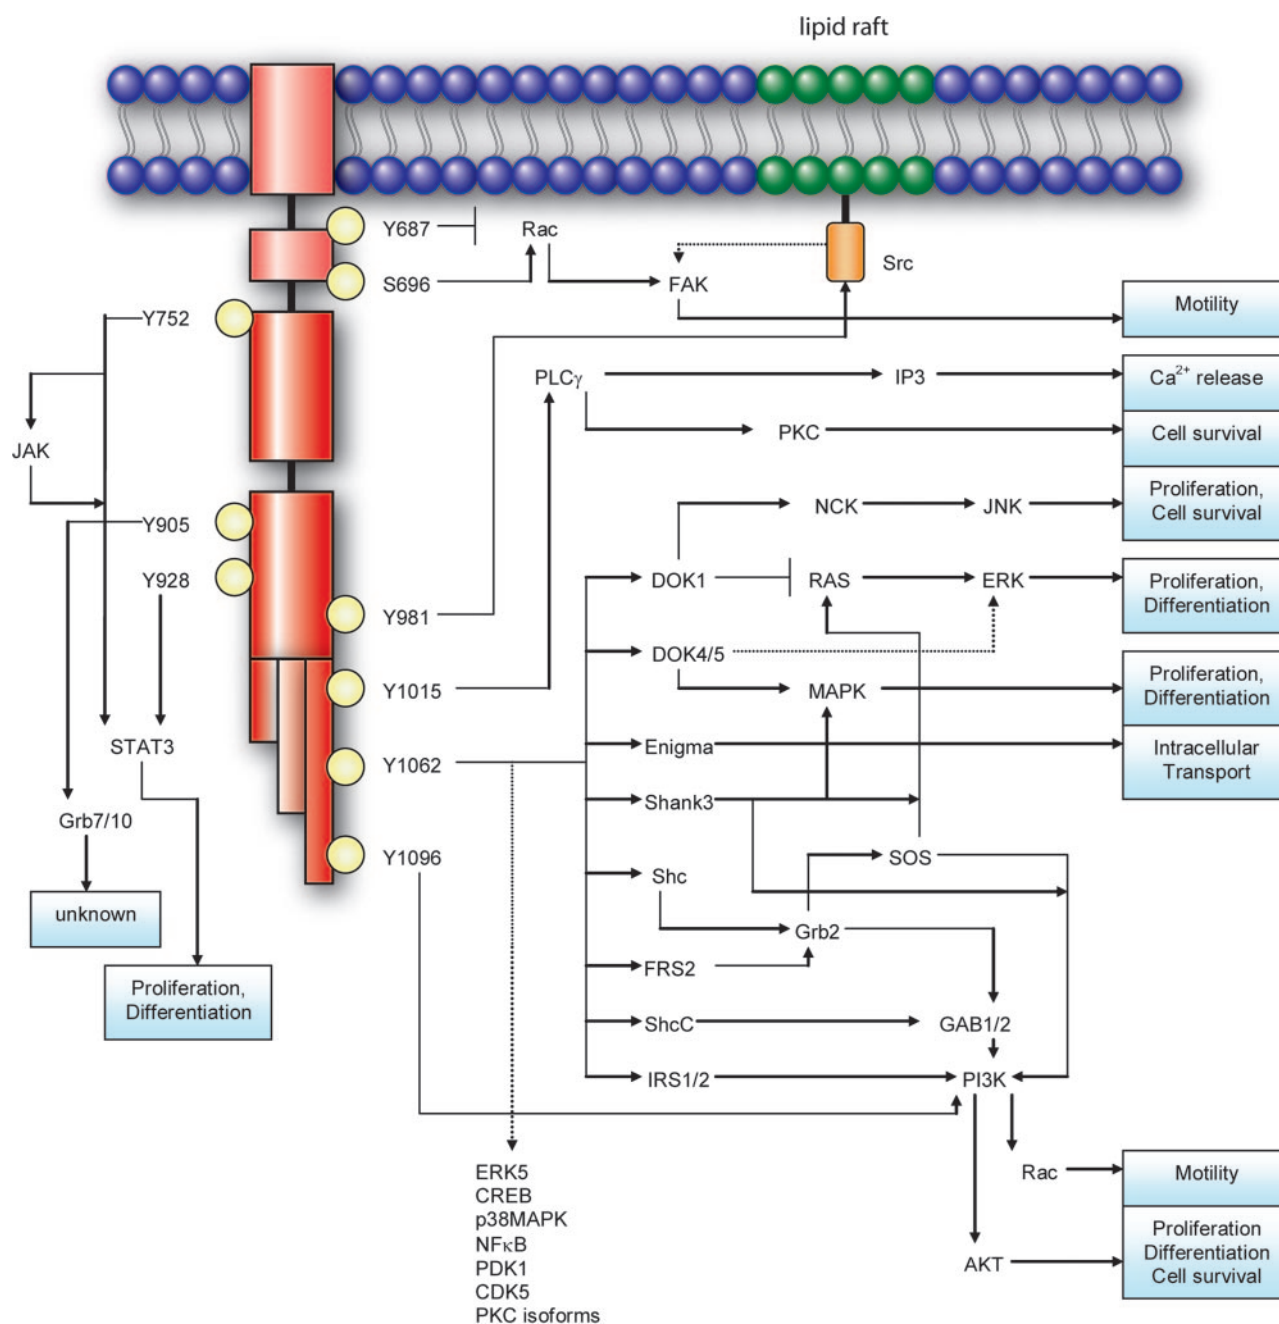

FIG. 3. Synopsis of the signaling network mediated by RET. The docking sites with their direct targets are shown. For the sake of simplicity the lipid raft is depicted outside RET. Dotted lines designate pathways that are not completely elucidated.

including Src-homology collagen (Shc), ShcC (also called Rai), insulin receptor substrate 1/2, fibroblast growth factor receptor substrate 2 (FRS2), downstream of kinase (DOK) 1/4/5, Enigma, ERK5, MAPK, phosphoinositide-dependent kinase 1, cyclin-dependent kinase 5 (CDK5), SH3 and multiple ankyrin repeat domains 3 (SHANK3), and PKC isoforms. Shc recruits the Grb2/son of sevenless multi-protein scaffold (SOS) complex and Grb2-associated binding protein (GAB)1/2 resulting in the activation of the phosphatidylinositol 3-kinase (PI3K)/v-akt murine thymoma viral oncogene homolog 1 (AKT) pathway (48). This pathway is responsible for survival signaling, enhanced cell-cycle

progression, and RET-mediated transformation (48, 49). The Grb2/GAB complex can also assemble directly onto phosphorylated Y1096, offering an alternative route to PI3K activation by GDNF (50). Recently, it was demonstrated that upon ligand activation, RET was down-regulated and disappeared from the cell surface via ubiquitin-proteasome protein degradation. This phenomenon was mediated by a Shc-Grb2 route, which could be activated through Y1062 and Y1096 (51). These findings demonstrate once more that various negative regulatory pathways closely regulate RET activity.

ShcC, a neuron-specific adaptor protein, and insulin re-

ceptor substrate 1/2 are also required for PI3K/AKT activation (52, 53). Moreover, cell motility and morphology are regulated via PI3K and members of the Rho family of GTPases, including Rho, Rac, and Cdc42 (33, 54, 55). The PI3K/AKT pathway and also the RAS/ERK pathway are important for activation of the transcription factors cAMP response element-binding protein and nuclear factor  $\kappa$ B (56). In addition, the binding of Shc as well as FRS2 to the Grb2/SOS complex induces the RAS/ERK and MAPK pathways (57, 58). These pathways contribute to cellular differentiation and proliferation through mitogenic signaling (59). Binding of DOK1 to Y1062 links RET to the Jun N-terminal kinase pathway, which is important in cell proliferation, cell survival, cell death, DNA repair, and metabolism (60, 61) and can suppress the RAS/ERK pathway by RAS-GTPase activating proteins (GAP) (62). DOK4 and DOK5 seem to have opposite effects to DOK1 by triggering MAPK and the ERK pathway (63). Enigma and SHANK3 bind specifically to Y1062 of RET9, despite its phosphorylation state. SHANK3 mediates sustained RAS/ERK, MAPK, and PI3K/AKT signaling (64), and Enigma is involved in transporting rearranged RET oncoproteins to the cell membrane (31, 65). How binding of ERK5 (66), cAMP response element-binding protein (56), p38 MAPK (56), nuclear factor  $\kappa$ B (67), phosphoinositide-dependent kinase 1 (68), CDK5 (69), and PKC isoforms (43, 70) to Y1062 functions in the complex network of RET-induced intracellular signaling pathways is not well established.

Finally, Y791, Y826, Y864, Y952, Y1029, and Y1090 are also phosphorylated, but their downstream signaling pathways still need to be delineated (30, 38).

## V. The Role of RET during Development and in Human Diseases

In Sections II, III, and IV, the structure of RET, the various ways of receptor activation, and the diverse RET signaling pathways have been described. Next, the role of RET during development and in endocrine tumors and cancer syndromes will be highlighted.

### A. The role of RET during development

RET is expressed mostly in the developing nervous and urogenital systems and plays a crucial role in the development of the enteric nervous system, the kidney, and spermatogenesis (3, 4, 72). In adult tissue, high levels of RET were observed in brain, thymus, peripheral enteric, sympathetic and sensory neurons, and testis (3, 6, 73).

At very early stages of development, RET is expressed in a cranial population of neural crest cells. A subset of RET-positive cells is subsequently observed in central nervous system nuclei, including the motor and catecholaminergic neurons. During development, RET-expressing neural crest cells migrate caudally via the intestinal mesenchyme to form the enteric nervous system, located in the gut wall of the gastrointestinal tract (3). Another portion of RET-expressing cells gives rise to early development of sensory and autonomic ganglia of the peripheral nervous system, adrenal

chromaffin cells, thyroid C cells, and the kidney (for review, see Refs. 6 and 73).

The critical role of RET during development is illustrated by the observation that mice expressing null mutations in RET lack superior cervical ganglia and the entire enteric nervous system; have agenesis or dysgenesis of the kidney, impaired spermatogenesis, and fewer thyroid C cells; and die shortly after birth (6, 72). The two isoforms *in vivo* of RET behave differently as concluded from *in vitro* assays in which RET 51 showed the highest transforming and kinase activity (74). Several observations suggested that the different isoforms of RET have different tissue-specific effects during embryogenesis. RET9 is sufficient to support normal embryogenesis and postnatal life. Mice expressing only RET51, however, have severe defects in the innervation of the gut and renal development (75).

### B. RET and endocrine tumors

1. *RET and papillary thyroid carcinoma (PTC)*. The clinical relevance of RET in human diseases was first recognized in PTC. PTC is the most prevalent thyroid cancer, accounting for 80 to 90% of all thyroid malignancies (76). There are several somatic genetic lesions associated with PTC, including oncogenic activation of the RAS (77), BRAF (78), MET (79), TSH-R, Gsa, and p53 genes (80) and chromosomal alterations that affect NTRK1 and RET (81). Specific rearranged forms of RET were detected in PTC (82). These chromosomal aberrations occur in 2.5 to 40% of cases and are the result of double-stranded DNA breaks (mostly radiation-induced), which lead to erroneous reparative fusion of the coding region for the C terminus of RET to the promoter and coding region of the N terminus of a constitutively expressed unrelated gene by virtue of their physical proximity (83). These fusion genes encode proteins that harbor the intracellular kinase domain of RET and the N-terminal domain of various proteins. The N-terminal domains of these various proteins all have the property to let the fusion protein dimerize, leading to autophosphorylation of tyrosine residues in the tyrosine kinase domain of RET. Almost exclusively, the breakpoints in RET occur at sites distributed across intron 11 (84), giving rise to proteins without a transmembrane domain. These gene fusions encode constitutively active cytoplasmic chimeric proteins named RET/PTC.

To date, 12 different fusion partner genes, depicted in Fig. 4, are reported to form (because of variable breakpoints) at least 17 different RET hybrid oncogenes (85, 86). The most prevalent variants of these chimeric oncogenes are RET/PTC1 (60 to 70%) and RET/PTC3 (20 to 30%) (86–88).

Exposure to external radiation, the major risk factor for the development of PTC, is associated with the formation of RET/PTC (83, 89, 90). After the nuclear power plant disaster in Chernobyl on 26 April 1986, the incidence of childhood PTC in Ukraine, Belarus, and neighboring counties increased dramatically in the subsequent years (91, 92) and RET/PTC rearrangements have been found in over 60% of post-Chernobyl PTCs (93). Furthermore, a high prevalence of RET/PTC has been detected in PTC patients previously subjected to external irradiation for benign or malignant disease (94). Most RET/PTC rearrangements are associated with exposure



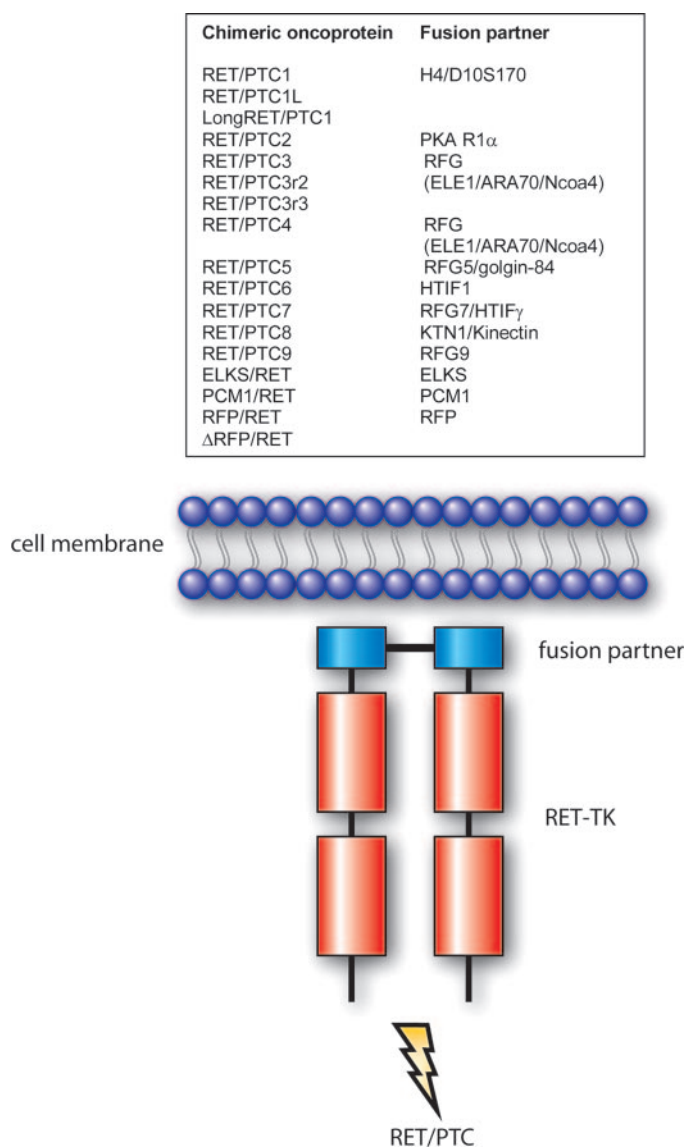

FIG. 4. In papillary thyroid cancer (PTC), rearrangement with various activating genes leads to the formation of chimeric RET oncoproteins. As a result, ligand-independent dimerization of the intracellular tyrosine kinase motifs occurs, leading to constitutive signaling of the RET tyrosine kinase. The diverse gene partners that have been found to rearrange with RET are listed.

to external radiation. Only *RET/PTC1*, *RET/PTC1L*, *RET/PTC2*, *RET/PTC3*, and *ELKS/RET* have been found in non-radiation-associated PTC (85).

Besides the association with ionizing radiation, there are several other indications that point to *RET/PTC* as a causative factor in the pathogenesis of PTC. *RET/PTC* transforms thyroid follicular cells *in vitro* (95), and specific overexpression of *RET/PTC1* and *RET/PTC3* in the thyroid of transgenic mice leads to the development of tumors that resemble PTC (96–98). Interestingly, not all transgenic mice developed thyroid tumors, implying that the expression of the oncoprotein is necessary but not sufficient for tumorigenesis. Conversely, wide differences in the prevalence of *RET/PTC* rearrangements in human PTC have been reported, ranging from 5 to 67% (85, 99, 100). Clearly tumorigenesis involves, besides the

*RET/PTCs*, multiple other genetic lesions in the development of PTC.

In microscopic PTC, *RET/PTC* expression is highly prevalent (99). This suggests that *RET/PTC* is activated at early stages of the disease.

Although several reports failed to demonstrate correlation of *RET/PTC* rearrangements with clinicopathological features of increased morbidity (101–103), different types of *RET/PTC* rearrangement are associated with variation in biological behavior. Patients with *RET/PTC1* usually show an indolent behavior, whereas *RET/PTC3* is associated with a more aggressive tumor phenotype (104–107). These observations are in keeping with transgenic mouse models expressing *RET/PTC*. Mice harboring *RET/PTC1* develop thyroid lesions with morphological features of PTC that do not metastasize, whereas mice carrying *RET/PTC3* are associated with solid tumor growth and metastases (97, 98).

Although *RET/PTC* rearrangements have been observed in Hashimoto's thyroiditis (108, 109), the absence of *RET/PTC* in PTC arising in the background of Hashimoto's thyroiditis suggests that the molecular basis of the association of Hashimoto's thyroiditis with follicular-derived thyroid cancer is different from *RET/PTC* rearrangement (110).

Somatic rearrangements of *RET* have also been found in familial PTC, which is more aggressive than its sporadic counterpart (111, 112). However, because linkage between *RET* and the disease phenotype is excluded, *RET* is not a predispositional factor in familial PTC (113).

**2. *RET* and Hürthle cell carcinoma.** The heterogeneous group of Hürthle cell neoplasms of the thyroid gland has been a matter of ongoing controversy regarding the histological classification, assessment of clinical behavior, and treatment recommendations (114, 115). Hürthle cell carcinomas are considered by some to be oxyphilic variants of follicular thyroid cancer (116), but others consider them a distinct histopathological entity (115). Hürthle cell tumors of the thyroid are unusual neoplasms characterized by the presence of oncocytes, which are large polygonal cells with hyperchromatic, often bizarre, nuclei and an eosinophilic granular cytoplasm. Most Hürthle cell carcinomas do not take up radioiodine and are generally believed to be more aggressive than follicular thyroid cancers (114, 115).

Several studies confirmed that *RET/PTC* is not restricted to PTC but can also occur in Hürthle cell adenomas and carcinomas (9, 100, 117, 118). Hyperplastic nodules with oncocyctic metaplasia are generally negative for *RET/PTC* activation (117). *RET/PTC* activation can probably be considered a secondary event in Hürthle cell adenomas and carcinomas, subsequent to the occurrence of genetic alterations determining oncocyctic metaplasia. Remarkably, Hürthle cell adenomas and carcinomas showed a comparable rate of *RET/PTC* rearrangements (117). Therefore, one could consider Hürthle cell tumors always malignant, much like PTCs, which actually share the same genetic variation. This may explain why the distinction between benign and malignant Hürthle cell tumors is very difficult and why apparently benign tumors at histological examination may give rise to distant metastasis. This may also explain why Hürthle cell carcinomas are thought to be more aggressive, simply be-

cause only the most aggressive forms are currently considered malignant.

### 3. Oncogenic RET activation in PTC and Hürthle cell carcinoma.

In the absence of rearrangements, *RET* expression is very restricted (but not absent) in thyroid follicular epithelial cell-derived tumors (119). The genes fused with *RET*, however, are constitutively expressed within thyroid follicular cells, and *RET/PTC* rearrangements therefore allow constitutive expression of the kinase domain of *RET*, which is essential for the malignant transformation of the thyroid cells (120). In addition, fusion with protein partners holding protein-protein interaction motifs provide *RET/PTC* kinases with dimerizing lineages, which results in ligand-independent autophosphorylation (31). Furthermore, *RET/PTC* recombinations delete the transmembrane domains that suppress mitogenic signaling (121), and hence it is likely that these oncoproteins are relocated to the cytosolic compartment of the cell. For that reason, another important function of the proteins that are rearranged with *RET* is in determining a localization at the plasma membrane, although interaction of *RET/PTC* with Enigma may be responsible for this relocation process as well (31, 65). The various activating fusion partners of *RET* may be distributed in different cellular compartments, permitting *RET* to interact with diverse groups of signaling proteins. This may be an explanation for the variation in oncogenic potential between different *RET*-associated types of PTC (87).

To obtain more insight in oncogenic *RET* signaling caused by rearrangements, it should be emphasized that *RET/PTC* signaling depends mainly on three key docking sites: Y905, whose phosphorylation stabilizes the active conformation of the kinase domain (37); Y1015, whose prolonged phosphorylation down-regulates a PKC-dependent negative feedback loop to promote cell survival and clonal expansion (43); and Y1062, whose phosphorylation recruits numerous signal transduction proteins to *RET/PTC* (6).

The oncogenic proteins involved in the initiation of PTC generally work along the same linear signaling cascade. Phosphorylation of tyrosine 1062 is relevant for sustained proliferation and motility of thyroid tumor cells by sequentially triggering RAS/BRAF/ERK activation (122). Enhanced activation of another signal-transduction route, the PI3K/AKT pathway, has also been reported in PTC (123). *RET* can activate AKT (via Y1062) through both PI3K-dependent and PI3K-independent mechanisms (68, 124). It is noteworthy that AKT activation is a common feature of aggressive thyroid cancers (125). The docking sites Y1015 and Y1062 are also required for stimulation of an osteopontin-CD44 autocrine loop initiated by *RET/PTC*. This loop activates ERK and AKT signaling pathways, is implicated in sustaining proliferation and invasiveness of thyroid cancer cells (126), and correlates with aggressive clinicopathological features of PTC (127).

*RET/PTC* signaling through Y905, Y1015, and Y1062 generally occurs independently of the type of rearrangement. However, there are some indications that different signaling cascades activated by the various *RET/PTC* rearrangements affect the clinical behavior of PTC. Miyagi *et al.* (128) have demonstrated that *RET/PTC3* expression (associated with

more aggressive PTC) preferentially activates the PI3K/AKT rather than the RAS/BRAF/ERK pathway. Nevertheless, it is still unclear how these cascades lead to cellular changes seen in PTC.

The variable clinical behavior of *RET*-associated PTC may also be explained by a difference in expression levels of *RET/PTC* in aggressive and indolent tumors. In a report of a small series of PTCs, it was suggested that tumor size correlates with *RET/PTC1* expression levels, but this was not significant. Remarkably, expression levels of *RET/PTC* did not correlate with the presence of lymph node metastases or tumor stage (129).

Finally, the involvement of different proteins fused to *RET* may play a role in tumor behavior. In the clinically more aggressive tumors that are associated with *RET/PTC3* rearrangements, the fusion gene is *RFG* (also called *ELE1*). *ELE1* is a coactivator of peroxisome proliferator-activated receptor- $\gamma$  (PPAR $\gamma$ ), which has tumor suppressor possessions (130). This observation has led to the hypothesis that, upon rearrangement with *RET*, *ELE1* is inactivated as coactivator of PPAR $\gamma$ . Hence, in tumors containing *RET/PTC3* rearrangements, a proto-oncogene (*RET*) is activated and a tumor suppressor (PPAR $\gamma$ ) could be inactivated (131).

Despite all efforts, thus far there is still little, if any, evidence whether and how the clinical behavior of human PTC is affected by the various *RET/PTC* rearrangements leading to activation of different downstream signaling proteins, differences in *RET/PTC* expression levels, or the involvement of different fusion genes.

### 4. RET, MEN 2, and FMTC.

The MEN 2 syndrome consists of two variants: MEN 2A and MEN 2B. MEN 2A is characterized by medullary thyroid carcinoma (MTC); originating from the calcitonin-secreting parafollicular C cells of the thyroid gland) or its precursor C cell hyperplasia (CCH), pheochromocytoma (a tumor of the adrenal chromaffin cells), and hyperparathyroidism. Rarely, MEN 2A can be associated with cutaneous lichen amyloidosis (a pruritic and pigmented papular lesion of the skin on the upper back) or HSCR. MEN 2B is characterized by MTC, pheochromocytoma, mucosal ganglioneuromatosis, thickened corneal nerves, and a distinct marfanoid habitus. FMTC is characterized by MTC or CCH alone (132) but can also be associated with HSCR.

In 1987, the genetic defect causing MEN 2A was located on chromosome 10 (133). In 1993, it was demonstrated that MEN 2A and FMTC were caused by germline *RET* mutations (134, 135). Subsequently, it became clear that MEN 2B was caused by germline mutations in the *RET* proto-oncogene as well, whereas somatic *RET* mutations were detected in tumor tissue of approximately 40% of sporadic (nonfamilial) MTCs (70, 136–138).

The pattern of inheritance in MEN 2 and FMTC is autosomal dominant, and all patients carry germline point mutations in the *RET* gene. The clinical expression of the MEN 2 variants and FMTC varies (Table 1), but MTC is generally the first neoplastic manifestation because of its earlier and higher penetrance compared with pheochromocytoma or parathyroid hyperplasia (139, 140). This indicates that C cells are more susceptible to (oncogenic) *RET* activation than adrenal medullary or parathyroid cells. The disease phenotype



TABLE 1. Clinical expression of the variants of hereditary MTC-associated syndromes

|                                | FMTC       | MEN 2A   | MEN 2B    |
|--------------------------------|------------|----------|-----------|
| MTC                            | 100        | 100      | 100       |
| CCH                            | 100        | 100      | 100       |
| Pheochromocytoma               | 0          | 10 to 60 | 50        |
| Hyperparathyroidism            | 0          | 10 to 30 | 0         |
| Cutaneous lichen amyloidosis   | 0          | <10      | 0         |
| HSCR                           | 0          | Rare     | 0         |
| Marfanoid habitus              | 0          | 0        | 100       |
| Intestinal ganglioneuromatosis | 0          | 0        | 60 to 90  |
| Mucosal neuromas               | 0          | 0        | 70 to 100 |
| Thick corneal nerves           | 0          | Rare     | 60 to 90  |
| Age at presentation (yr)       | <20 to >50 | <20      | <10       |

Data are expressed as percent unless otherwise specified.

correlates strongly with mutations in specific codons of *RET* (Fig. 5) (139–141) independent of the amino acid type substitutes (142, 143). MEN 2B is usually caused by mutations in the tyrosine kinase 2 subdomain (in 95% of cases involving codon 918 and in 5% codon 883). Infrequent germline missense mutations were reported at codons 804 and 806 in the same allele and also at codons 804 and 904 in the same allele,

although the phenotype corresponding with the codon 804/904 double mutation does not meet the diagnostic criteria for MEN 2B (144, 145). MEN 2A and FMTC mutations affect primarily the extracellular cysteine-rich domain and are less frequently associated with mutations in the kinase domain (Fig. 5) (139, 146). In MEN 2A, codon 634 is most frequently affected (85%), mostly by a C634R substitution (which has never been found in FMTC), whereas in FMTC the mutations are more evenly distributed among the various codons (135, 140, 146). In 10 to 15% of MEN 2A and FMTC cases, codons 609, 611, 618, or 620 are affected, whereas in about 5% mutations do not reside in codon 609, 611, 618, 620, or 634. In these cases, patients carry rare mutations at the extracellular codons 321, 533, 600, 603, 606, 630, 649, and 666 (146–152) or the intracellular codons 768, 777, 778, 781, 790, 791, 804, 852, 891, and 912 (Fig. 5) (153–163). Some mutations (R321G, G533C, R600Q, K603E, Y606C, S649L, N777S, V778I, Q781R, I852M, and R912P) have only been associated with (F)MTC in a single pedigree (147–152, 154, 155, 160, 163). In addition, double *RET* mutations (C618S with E623K, C634Y with D631E, C634W with R635G, C634R with R640G, C634S with

Downloaded from https://academic.oup.com/edrv/article/27/5/535/2355248 by guest on 25 April 2024

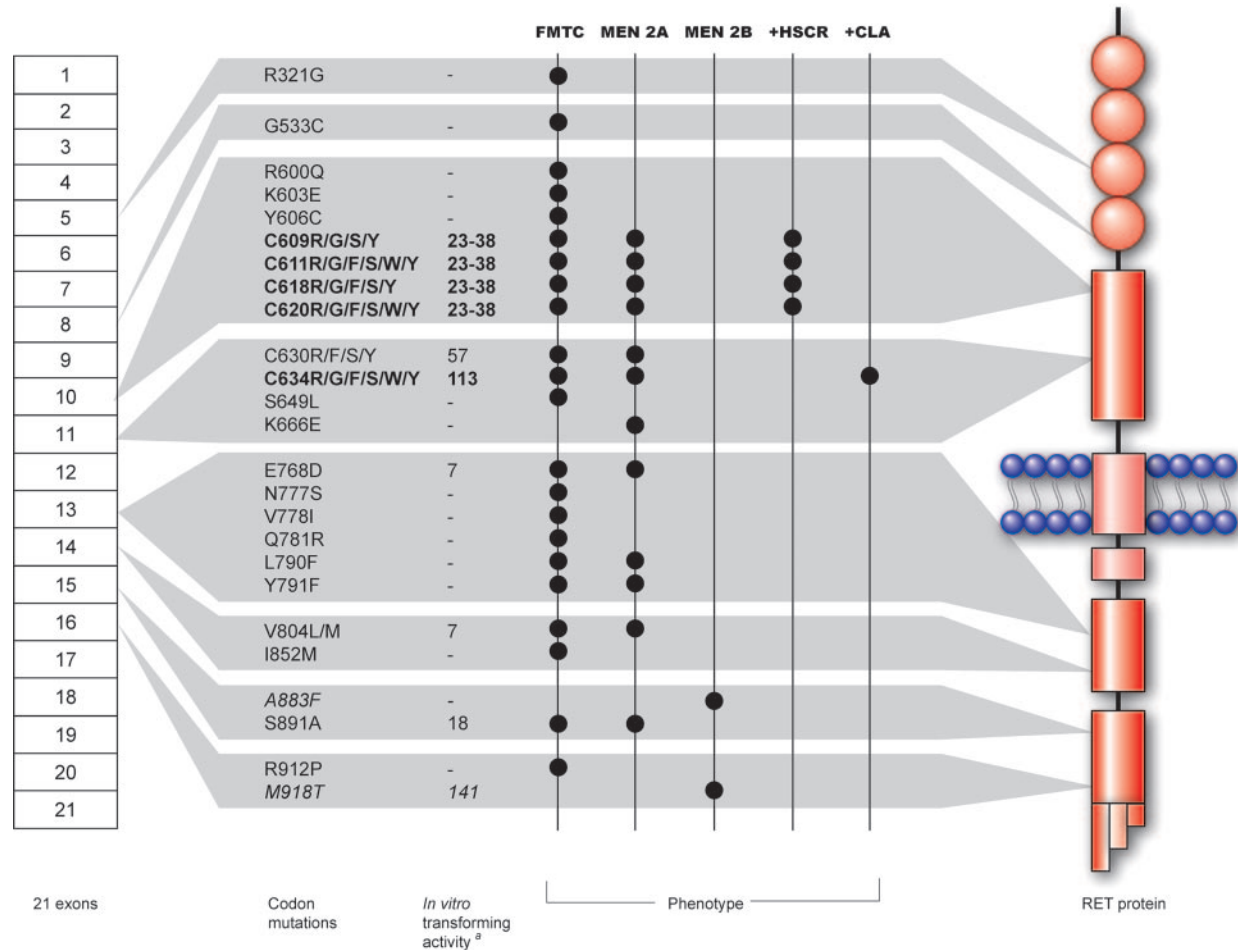

FIG. 5. Overview of the known germline missense mutations in the *RET* gene and their associated human diseases. The structure of the *RET* mRNA and the RET protein are depicted schematically. The mutations responsible for the diverse inherited cancer syndromes and the location of the mutations relative to the exons and the functional domains are shown. The most common mutations that are found in about 95% of MEN 2A and FMTC cases are depicted in **bold**, and MEN 2B mutations are depicted in *italics*. CLA, Cutaneous lichen amyloidosis. [° Derived from Ito *et al.* (142) and Iwashita *et al.* (74).]

A641S, C634R with V648I, and V804M with R844L), small insertions (in codons 532, 635, and 637), deletions (codon 616), and small insertion-deletion mutations (codons 631, 633, 635/636, 666, and 882) have been described in MEN 2A and FMTC (144, 152, 164–175). Experience in penetrance and aggressiveness is limited to a handful of pedigrees carrying these rare mutations, and genotype-phenotype correlations should therefore be interpreted with caution.

Some germline *RET* mutations are associated with MTC (or other endocrine tumors) only when they are present in a homozygous state, suggesting that these mutations have weak transforming capacities (176, 177). For example, mutations in codon 804 have variable clinical impact and can cause low penetrance disease, with late onset and a relatively indolent course (178) or more aggressive disease (179, 180). Individuals heterozygous for such weakly transforming mutations of *RET* likely require a second germline or somatic mutation in *RET*, a downstream signaling gene, or a tumor suppressor gene to result in clinical expression of MEN 2 (181). The occurrence of these second mutations and their transforming ability could account for the observed clinical variability in expression of germline mutations with very low transforming activity.

**5. *RET*, MEN 2, and FMTC associated with HSCR.** HSCR or colonic aganglionosis is characterized by the absence of the enteric ganglia along variable lengths of colon and is the main cause for congenital constipation with an incidence of 1 per 5000 live births. HSCR is a heterogenic disorder, because a number of genes have been shown to play a role in the disease etiology. To date, 10 genes have been associated with HSCR (182, 183). The major susceptibility gene is *RET*, in which mutations have been identified in 50% of familial and 15 to 35% of sporadic HSCR cases (182, 184). Most HSCR-associated mutations disable the activation or expression of *RET* (6), whereas the typical MEN 2 mutations result in constitutively active *RET*. Nevertheless, HSCR can be found in association with MEN 2A and FMTC in patients with a single point mutation at codon 609, 611, 618, or 620 (185).

**6. *RET* and sporadic MTC.** In 40 to 50% of sporadic MTCs, somatic *RET* mutations have been found. The most common mutation is M918T, although mutations at codons 609, 611, 618, 620, 630, 631, 632, 634, 636, 639, 641, 748, 766, 768, 876, 883, 884, 901, 908, 919, 922, and 930 and deletions including codons 592 to 607, 630, 632/633, 633 to 635, and 634 have also been described (135, 136, 138, 186–196). Sporadic MTCs show attributes of both MEN 2A and MEN 2B-related MTC (72). The contribution to tumor development of somatic *RET* mutations in MTC pathogenesis is unclear, although tumors with a somatic codon 918 mutation appear to be more aggressive (186, 189, 197). Somatic *RET* mutations are not consistently distributed within primary tumors and metastases, indicating that the mutation can occur during progression of the tumor or that MTC is a disease of polyclonal origin (138). Probably in these cases, somatic *RET* mutations merely contribute to the disease phenotype instead of causing it.

**7. *RET* and sporadic pheochromocytoma.** In apparent sporadic pheochromocytomas, the frequency of germline *RET* mutations ranges from 0 to 5% (198, 199). Somatic *RET* mutations

have been found in 0 to 31% of tumors, mostly at codon 918 (136, 200–203) and appear to occur less frequently in malignant than in benign pheochromocytoma (200, 203). The contribution of germline and somatic *RET* mutations in the evolution of apparent sporadic benign and malignant pheochromocytomas therefore seems to be minimal, and other genes likely play a more important role in tumorigenesis of pheochromocytoma.

**8. Oncogenic *RET* activation in sporadic and hereditary neuroendocrine tumors.** Mutated *RET* plays a very significant role in the development of human neuroendocrine tumors and tumor syndromes. Oncogenic *RET* activation and signaling differs from activation and signaling of nonmutated *RET*. These differences in the various neuroendocrine tumors will be described next.

In MEN 2 and FMTC, the activation of oncogenic *RET* depends on the location of the amino acid change. Mutations in the extracellular cysteine-rich domain are generally found in MEN 2A (Fig. 5) and convert a cysteine residue into a noncysteine residue. Normally, these cysteine residues are involved in intramolecular disulfide bonds in wild-type *RET*. The mutation leaves an unpaired cysteine residue in a *RET* monomer to form an aberrant intermolecular disulfide bond with another mutated monomer. The two mutated *RET* molecules are constitutively dimerized and activated in *trans*. Mutations in the intracellular tyrosine kinase domain, which are generally found in MEN 2B and FMTC (Fig. 5), activate tyrosines in the kinase domain and alter its substrate specificity due to structural changes of the binding pocket of the tyrosine kinase domain. They lead to aberrant phosphorylation of substrates preferred by cytoplasmic tyrosine kinases such as c-Src and c-abl rather than the substrates preferred by normal receptor tyrosine kinases (36, 204). Consequently, the mutated *RET* no longer needs dimerization to become active (205).

It is remarkable that, although mutated *RET* signals independent of ligand, in several mutation types *RET* can be further activated by GDNF (206). MEN 2B-associated intracellular mutations, for instance, could be activated by GDNF as opposed to intracellular FMTC mutations. This same phenomenon was observed for extracellular codon 634 mutations that were responsive to GDNF, whereas codon 620 mutations were not (207).

Little is known about the (mutation-specific) signaling pathways of *RET*. There may be subtle differences in protein conformation when *RET* is activated by ligand binding, MEN 2A mutations, MEN 2B mutations, or FMTC mutations leading to the initiation of different intracellular signaling pathways. Wild-type *RET*, MEN 2A-related *RET* (*RET*/MEN 2A), FMTC-related *RET* (*RET*/FMTC), and MEN 2B-related *RET* (*RET*/MEN 2B) display differences in phosphorylation of docking sites and isoforms of the *RET* receptor (71, 208, 209). In *RET*/MEN 2, a variable pattern of phosphorylation, including docking sites Y752, Y905, Y928, and Y1096 has been identified (35, 208). Phosphorylation of Y752 and Y928 results in activation of STAT3 in *RET*/MEN 2A and *RET*/FMTC (35, 36), and the transforming activity of *RET*/MEN 2A but not *RET*/MEN 2B depends on phosphorylation of Y905 (37). With regard to Y1096, it has been demonstrated that in *RET*/

MEN 2B, Y1062 phosphorylation is enhanced and Y1096 phosphorylation is reduced, whereas in RET/MEN 2A, Y1096 phosphorylation is enhanced (30).

These differences in phosphorylation of docking sites and response to GFLs may give rise to altered activation of downstream signaling routes. This seems indeed to be the case. RET/MEN 2A, for instance, impacts substantially on downstream AKT activation compared with RET activated by its natural ligand (210). Several additional findings suggest that different mutated RET proteins might have different effects on tumorigenesis. The PI3K/AKT pathway responsible for survival signaling, enhanced cell-cycle progression, and RET-mediated transformation is more highly activated in RET/MEN 2B than in RET/MEN 2A (48, 49). Because of the enhanced Y1062 phosphorylation of RET/MEN 2B compared with RET/MEN 2A, higher activation levels of the RAS/MAPK and PI3K/AKT pathway are triggered (211). These observations suggest that PI3K/AKT is (one of the) most important oncogenic signaling pathways.

Further evidence for differences in oncogenic signaling between the various mutation types is provided by the strong association of the JNK pathway with RET/MEN 2B and involvement of this pathway in the ability of MEN 2B-related MTC to metastasize (62, 63). Moreover, the activation of STAT3 by an extracellular RET/MEN 2A mutation is independent of Janus tyrosine kinases and c-Src. In contrast, RET<sup>Y791F</sup> and RET<sup>S891A</sup> (intracellular monomeric FMTC/MEN 2A mutations) activate STAT3 via c-Src and Janus tyrosine kinases (36).

The behavior of MEN 2 and FMTC-related MTC subtypes can be coupled to specific gene expression profiles. Screening analysis using an *in vitro* model of NIH3T3 cells expressing RET/MEN 2A and RET/MEN 2B identified 10 genes that were induced by both mutations, and eight genes were repressed (59). The induced genes included cyclin D1, cofilin, and cathepsin L and B, which are known to be implicated in cell growth, tumor progression, and invasion. The repressed genes included type 1 collagen, lysyl oxidase, annexin 1, and TIMP3 genes that have been associated with tumor suppression. Furthermore, RET/MEN 2A predominantly induced six genes, and RET/MEN 2B predominantly induced five genes. Among these genes, ITGA6 expression has been suggested to play a role in the MEN 2A phenotype, and STC1 in the MEN 2B phenotype. Expression microarray analysis of human MEN 2A- and MEN 2B-related MTC demonstrated up-regulation of a cluster of genes associated with matrix remodeling and the epithelial to mesenchymal transition. These and other gene products in the MEN 2B cluster have been previously associated with an increased metastatic potential in a variety of other tumors, including breast, prostate, and bladder carcinomas (72).

**9. Oncogenic RET activation in MEN 2 and FMTC associated with HSCR.** MEN 2A and FMTC can cosegregate with HSCR, and these phenotypes are, in these cases, caused by the same RET mutation. Several observations have been made that could offer an explanation for this apparent contradicting phenomenon, including a decreased cell surface expression of RET in these patients (212) and a kinase activity under a certain threshold required for cell survival (142). However, the im-

pact of GDNF-mediated signaling may influence oncogenic signaling. As described above, pure MEN 2A mutations such as C634R are responsive to GDNF, whereas HSCR/MEN 2A- and HSCR/FMTC-mutated RET (for instance C620R) does not respond to GDNF (207). Insensitivity to GDNF renders cells more prone to apoptosis, and these features are shared by all HSCR-associated mutations of RET (213). Unlike the HSCR/MEN 2A mutations, pure MEN 2A mutations such as the C634R mutation are responsive to GDNF and are therefore most likely not associated with HSCR (207). A similar influence of GDNF has been demonstrated for MEN 2B-associated RET<sup>M918T</sup> as opposed to FMTC-associated RET<sup>Y791F</sup> and RET<sup>S891A</sup>. RET<sup>M918T</sup> displays larger oncogenic potential and has been shown to be GDNF-responsive, whereas RET<sup>Y791F</sup> and RET<sup>S891A</sup> are not (36). These findings suggest that differences in the mechanism of receptor activation combined with differences in GDNF responsiveness of these receptors, as well as tissue-specific expression of GDNF (or related ligands), could give rise to different disease phenotypes (214).

## VI. RET Polymorphisms and Haplotypes in Endocrine Tumors

Common polymorphic variants of RET can also contribute to the disease phenotype. A genetic locus is considered polymorphic if one or more of the rare alleles has (have) a frequency of at least 0.01. Most polymorphisms do not alter the functional activity of the encoded protein, but not all polymorphisms are neutral. If the presence of a polymorphism or haplotype (a set of closely linked markers or polymorphisms inherited as a unit) correlates (or associates) with a certain phenotype, it might be that it acts as a genetic modifier and may be associated with a (small to moderate) increased relative risk for the development of the disease. It might also be that polymorphisms interact with other genetic variants and with traditional germline MEN 2-associated mutations to modulate development of features and age at onset. Moreover, because polymorphisms are relatively common in the population, they may present a much higher attributable risk in the general population than rare mutations in high penetrance cancer susceptibility genes such as RET.

### A. Papillary thyroid carcinoma

Only a few studies of an association between RET polymorphisms and haplotypes and PTC have been reported so far (215–217). These studies demonstrated a weak association with PTC and the single nucleotide polymorphisms (SNPs) A45A, L769L (215), A432A (217), G691S, and S904S (216). Furthermore, analysis of haplotype frequencies suggested that one specific haplotype, named the GGCC haplotype, may act as a low penetrance predisposing allele for PTC in the Italian and French populations (215). However, all things considered, the magnitude of the effect between the RET SNPs/haplotypes and PTC is quite modest at best and should be confirmed on larger samples.



### B. Multiple endocrine neoplasia type 2 and familial medullary thyroid carcinoma

Because both related and unrelated individuals with the same germline *RET* mutations develop MTC (and pheochromocytoma) at different ages, other genetic or epigenetic events may trigger tumorigenesis, including the presence of *RET* polymorphisms and ancestral haplotypes. Several SNPs and haplotypes of *RET* have been described in the general population (218) and in association with MEN 2A (219). A recent study suggested that the polymorphic G691S/S904S variant of *RET* has a modifier effect on the age at which MEN 2A begins (219), and another recent study suggested an association of the SNP L769L with the FMTC germline mutation F791Y (220). Nevertheless, the mechanism of action of these potential genetic modifiers remains to be demonstrated.

### C. Sporadic medullary thyroid carcinoma

Several *RET* polymorphisms have been described in sporadic MTC. In a study among sporadic cases of MTC from Germany and the United States, the SNP S836S was overrepresented and apparently associated with the somatic mutation M918T in the tumoral DNA from the same patients (221). These results were independently confirmed in another study of Spanish MTC patients (222). However, in other studies of French, Polish, British, Chilean, and Austrian patients, respectively (220, 223–226), the S836S polymorphism was not found associated with predisposition to sporadic MTC.

The IVS1–126G→T polymorphism was significantly overrepresented in Spanish patients with sporadic MTC, and the disease is associated with a specific haplotype within *RET* intron 1 that contains IVS1–126G→T and IVS1–1463T→C (227). However, the association between this SNP and sporadic MTC was excluded in UK patients (225).

The association of haplotype CGGATGCCAA and sporadic MTC was recently demonstrated in patients from the United Kingdom. This haplotype harbors the SNPs G691S, S904S, and STOP + 388 bp on exon 19 (225). G691S and S904S have previously been associated with sporadic MTC and MEN 2A (176, 219) and G691S is thought to be the functional polymorphism. It was hypothesized that the G→S amino acid change creates a new phosphorylation site, which affects downstream signaling (219). It could also be that the SNP changes the secondary structure of RET, affecting flexibility and solvent accessibility of the protein (225). Further experimental data, however, are needed to verify these hypotheses. It is of note that the germline sequence variant in intron 14 (IVS14–24G→A), originally interpreted as a disease causing mutation for HSCR (228), has also been found in a significantly higher frequency in patients with sporadic MTC and in subjects with moderately elevated serum calcitonin concentrations after pentagastrin stimulation, when related to a control group (220). In contrast, IVS14–24G→A was not associated with either HSCR or sporadic MTC in another study (229). Interestingly, a haplotype with a protective effect for sporadic MTC was recently identified (225). This haplotype contained the SNP A45A, which was previously asso-

ciated with an increased risk of HSCR (230). Despite these findings, it is unlikely that A45A is responsible for this protective effect because it was also present in a haplotype that lacked association with sporadic MTC (225).

Furthermore, GFR $\alpha$ 1–193, a polymorphism of the *GFR $\alpha$ 1* gene, was found to be associated with sporadic MTC in a small case-control study (231). However, in two larger studies, this association could not be reproduced (225, 232).

The potential role of the different polymorphisms in the development of sporadic MTC needs to be further characterized, and the molecular background of these polymorphisms needs to be elucidated.

### D. Sporadic pheochromocytoma

An ancestral, low-penetrance *RET* haplotype is strongly associated with and overrepresented in sporadic pheochromocytoma. It comprises the wild-type allele at IVS1–126 and IVS1–1463, with a 16-bp intron 1 deletion 5' of these SNPs (233). In addition, a significant association between the patients' age at diagnosis and genotype was found, suggesting that the additive effect of the haplotypes can modulate the age of onset of the disease.

## VII. Diagnostic and Therapeutic Implications of the *RET* Genotype in Multiple Endocrine Neoplasia Type 2 and Familial Medullary Thyroid Carcinoma

Patients who present with MTC should undergo genetic screening for germline *RET* mutations because the likelihood of a familial component is relatively high (2.5 to 7% in apparent sporadic MTC; Ref. 146) and early thyroidectomy proved to be the only effective curative or preventive treatment (234–236). In the assessment of at-risk individuals, DNA analysis for the detection of mutations in the *RET* gene is the gold standard, and a positive result is the single indication for recommending surgery (172). Genetic screening includes the analysis of exons 10, 11, 13, 14, 15, and 16 because the clinically relevant mutations are located in these exons (140). The recent discovery of a *RET* germline mutation in codon 321 in exon 5 (147) and codon 533 in exon 8 (148) indicates that analysis of exons 5 and 8 should be considered in patients and families at risk for MEN 2 and without identified mutations in exons 10, 11, 13, 14, 15, and 16 and maybe even in every patient presenting with MTC.

MTC has nearly a 100% penetrance in MEN 2 syndromes and FMTC, but the aggressiveness and clinical course differ between the different types of MEN 2. Therefore, based on recent literature, *RET* mutations have been stratified into three groups, levels 1 to 3. Patients with MEN 2B have the most aggressive MTCs (mutations in codon 883 or 918). They are classified as level 3. Patients with MEN 2A/FMTC-related level 2 mutations (codon 609, 611, 618, 620, 630, 634) are at high risk, and patients with *RET* codon 768, 790, 791, 804, and 891 (level 1) mutations are classified as having the least high risk for the development and growth of aggressive MTC (140, 143). The biological behavior of MTC observed in patients with level 1 mutations, however, is variable, and MTC with lymph node metastases has been reported even at the age of 6 in these patients (143). Recently, new insights re-

garding average tumor behavior in MEN 2/FMTC kindreds with a particular mutation regarding the development of MTC and pheochromocytoma have been described (141, 143, 237–239). Timing of screening and treatment for MEN 2-associated tumors may now be based on the type of *RET* mutation in patients with a MEN 2/FMTC genotype. A treatment and screening strategy based on the earliest occurrence of MTC, pheochromocytoma, and primary hyperparathyroidism for carriers of germline *RET* mutations as well as the *in vitro* transforming capacities of the different mutations (74, 142) (Fig. 5) is depicted in Table 2. Total thyroidectomy and central lymph node dissection should be performed in the first year of life in patients with level 3 mutations because MTC is present very early and these patients have a high risk of lymph node metastases (240). In asymptomatic carriers of level 2 mutations, total thyroidectomy is generally recommended before the age of 5, although based on the youngest age of occurrence of MTC and the *in vitro* transforming activity of the mutations, surgery is warranted before the age of 2 in patients with a mutation in codon 630 or 634. It should be noted, however, that all reported patients with a codon 630 or 634 mutation who have been operated around the age of 4 or 5 yr had undetectable serum calcitonin levels post-operatively (140, 143, 172, 234, 236, 241–248). Finally, in asymptomatic carriers of level 3 mutations, total thyroidectomy is recommended before the age of 10.

There is still a great amount of controversy regarding the issue of when to perform a central lymph node dissection (140). The interval between the emergence of MTC and the evolution of lymph node metastases has been estimated to be 6.6 yr for carriers of the most common mutations in codon 634 (143). Lymph node metastases are uncommon before the age of 10 yr in patients harboring mutations in codon 630 or

634 (143, 235) and before the age of 20 yr in patients with mutations in codon 609, 611, 618, 620, and 912 and the level 1 mutations (143, 163, 235). However, individual predictions of phenotype can be very unreliable based solely on *RET* genotype. This is illustrated by the emergence of MTC with lymph node metastases in two patients, respectively 5 and 10 yr old, with a *RET* mutation in codon 634 (249, 250), a 6-yr-old patient with a codon 804 mutation (251), and a 10-yr-old patient with a codon 790 mutation (252). These patients all had abnormal basal and/or stimulated serum calcitonin levels. Therefore, it is advisable to perform a total thyroidectomy including a central compartment dissection, irrespective of the patient's age in case of abnormal calcitonin levels.

In MEN 2A patients with a codon 634 *RET* mutation, pheochromocytomas have been identified as early as 5 and 10 yr of age (140). However, the recent results of a single institute cohort study suggest a later age of onset and a codon-specific, age-related development of MEN 2-associated pheochromocytoma (237). Based on a worst case scenario, screening for pheochromocytoma through the annual measurement of urinary catecholamines and metabolites should commence before the earliest reported age of presentation. Therefore, except for patients with a *RET* mutation in codon 634 (and presumably also in codon 630), who should be screened from the age of 5 yr onward, screening for pheochromocytoma may be postponed until the age of 20 in patients with level 1 and 2 mutations. Likewise, screening for primary hyperparathyroidism (serum calcium and PTH) should commence before the age of 10 in carriers of a codon 634 and codon 804 mutation and could be postponed to the age of 20 yr in other mutation carriers. For pragmatic reasons, screening for pheochromocytoma and primary hyperparathyroidism could best be combined.

TABLE 2. Management of MEN 2 and FMTC patients according to *RET* genotype<sup>a</sup>

| Risk category | Risk level | <i>RET</i> codon | Youngest age at first diagnosis |               |             | Recommended age for surgery (yr) |                               | Recommended age to start screening (yr) |     |
|---------------|------------|------------------|---------------------------------|---------------|-------------|----------------------------------|-------------------------------|-----------------------------------------|-----|
|               |            |                  | MTC                             | PCC (yr)      | HPT (yr)    | Thyroidectomy                    | Central lymph node dissection | PCC                                     | HPT |
| Highest       | 3          | 883              | Not described                   | Not described |             | <1                               | <1                            | 10                                      |     |
|               | 3          | 918              | 9 months                        | 12            |             | <1                               | <1                            | 10                                      |     |
| High          | 2          | 609              | 5 yr                            | 22            | Unspecified | <5                               | ≥20 <sup>b</sup>              | 20                                      | 20  |
|               | 2          | 611              | 7 yr                            | 30            | Unspecified | <5                               | ≥20 <sup>b</sup>              | 20                                      | 20  |
|               | 2          | 618              | 7 yr                            | 29            | 41          | <5                               | ≥20 <sup>b</sup>              | 20                                      | 20  |
|               | 2          | 620              | 6 yr                            | 22            | Unspecified | <5                               | ≥20 <sup>b</sup>              | 20                                      | 20  |
|               | 2          | 630              | 12 months                       |               | 32          | <2                               | ≥10 <sup>b</sup>              | 5                                       | 20  |
|               | 2          | 634              | 13 months                       | 5             | 10          | <2                               | ≥10 <sup>b</sup>              | 5                                       | <10 |
|               | 2          | 912              | 14 yr                           |               |             | <5                               | ≥10 <sup>b</sup>              | 20                                      | 20  |
| Least high    | 1          | 533              | 21 yr                           |               |             | 5–10                             | ≥20 <sup>b</sup>              | 20                                      | 20  |
|               | 1          | 649              | 44 yr                           |               |             | 5–10                             | ≥20 <sup>b</sup>              | 20                                      | 20  |
|               | 1          | 666              | 35 yr                           | 35            |             | 5–10                             | ≥20 <sup>b</sup>              | 20                                      | 20  |
|               | 1          | 768              | 22 yr                           | 59            |             | 5–10                             | ≥20 <sup>b</sup>              | 20                                      | 20  |
|               | 1          | 790              | 10 yr                           | 28            |             | 5–10                             | ≥20 <sup>b</sup>              | 20                                      | 20  |
|               | 1          | 791              | 21 yr                           | 38            | 38          | 5–10                             | ≥20 <sup>b</sup>              | 20                                      | 20  |
|               | 1          | 804              | 6 yr                            | 28            | 10          | 5–10                             | ≥20 <sup>b</sup>              | 20                                      | <10 |
|               | 1          | 891              | 13 yr                           | 52            |             | 5–10                             | ≥20 <sup>b</sup>              | 20                                      | 20  |

For mutations at codons 321, 603, 606, 777, 778, 781, and 852, insufficient data are available for recommendations, but most likely they belong to risk level 1. PCC, Pheochromocytoma; HPT, hyperparathyroidism.

<sup>a</sup> The recommendations are based on the 1999 International Consensus Statement (140) and extended with results from recent literature (141, 143, 151, 152, 163, 180, 235, 237).

<sup>b</sup> No consensus has been reached for the extent of surgery for MTC in patients carrying these germline mutations in the *RET* gene. Recommendations are based on recent literature. If basal or pentagastrin-stimulated calcitonin levels are abnormal in *RET* mutation carriers, thyroidectomy and central lymph node dissection should be performed immediately.

## VIII. RET as a Therapeutic Target

### A. Current treatment options for RET-associated endocrine tumors

The current recommended treatment for PTC is total thyroidectomy followed by adjuvant  $^{131}\text{I}$  therapy. Alternative treatment options have limited effect (76). In general, this treatment strategy is safe. However, in around 20% of patients, treatment is unsuccessful, and patients with persistent disease have a median life expectancy compared with the general population of only 60% (253). In MTC and pheochromocytoma, surgically removing all neoplastic tissue is the only treatment option with curative intent. Once MTC and, in rare cases, MEN 2-associated malignant pheochromocytoma has metastasized, there are no therapeutic options (254) although  $^{131}\text{I}$ -meta-iodobenzylguanidine therapy can provide long-term palliation in disseminated malignant pheochromocytoma (255). Therefore, there is an urgent need to search for new kinds of treatment.

### B. Various ways to inhibit RET signaling

Although the impact of inhibition of RET signaling on normal untransformed cells is poorly understood, it seems an attractive option, especially because the adverse effects of several potential RET inhibitors that have been evaluated in clinical trials appear to be limited and manageable. In pre-clinical literature, several ways to block different steps in the functioning of tyrosine kinases have been developed (Fig. 6). In the above, crucial steps in the activation and signaling of RET have been described, including the formation of ligand-coreceptor (GFR-GFL) complexes, dimerization, autophosphorylation of RET, recruitment of adaptor proteins to various docking sites, and initiation of signal transduction cascades. Down-regulation leading to the disappearance of RET from the cell surface constitutes another important means of regulation and a potential target for therapy. All these steps may be subject to specific inhibitors. Furthermore, several therapeutic options regarding the biosynthesis of RET have been described (256). Still, many ways of inhibition have not been tested on RET or clearly exploited in drug candidates so far. Next, we will present and discuss an overview of current developments in therapeutic drugs aiming at attenuating RET signaling.

### C. Ligand binding: antagonists and monoclonal antibodies

The first step in the activation of RET is binding of GFL to the GFR coreceptor. Targeting GFLs or the binding site of the coreceptor therefore represents a straightforward approach for RET inhibition. Two synthetic agents (GFB-111 and GFA-116) that selectively bind to platelet-derived growth factor (PDGF) and vascular endothelial growth factor (VEGF), respectively, disrupt binding to their receptor-tyrosine kinase [PDGF receptor (PDGFR) and VEGF receptor (VEGFR)] and inhibit the oncogenic signaling function of both growth factors *in vitro* and *in vivo* (257, 258). However, of several (co-) receptor antagonists that have been developed, none targets RET or its coreceptors.

Monoclonal antibodies against the GFLs seem an attractive

target as well, because MEN 2B-associated RET<sup>M918T</sup> and MEN 2A-associated RET<sup>C634R</sup> are still responsive to GDNF. However, such antibodies do not yet exist for RET.

### D. Dimerization: inhibitors

The second step in RET activation is dimerization. A few studies have shown that small peptides can be used to inhibit dimerization of receptor tyrosine kinases that are implicated, via a mutation or overexpression, in human cancer (259, 260). It is thought that the transmembrane domains of receptor tyrosine kinases are directly involved in receptor dimerization and activation. If this is indeed the case, then introduction in the membrane of peptides corresponding to the transmembrane domain should compete with dimerization and thus inhibit the kinase activity. In human cancer cells overexpressing ErbB2 (also called HER2 or Neu) and epidermal growth factor receptor tyrosine kinases, expression of small transmembrane peptides indeed inhibited the tyrosine kinase activity (261). Whether similar inhibitory approaches also may be applicable to other receptor tyrosine kinases remains to be studied.

With the systematic evolution of ligands by exponential enrichment technology, specific oligonucleotide ligands (aptamers) can be generated. These aptamers can be used to identify markers on the surface of a cell type, define the specificity of a cellular state, and allow *in vivo* targeting for diagnostic and therapeutic applications (262). Aptamers are specific, have a high affinity for their target, are poorly immunogenic, and can recognize a wide variety of targets. The neutralizing, nuclease-resistant D4 aptamer was capable of binding and inhibiting wild-type RET and RET/MEN 2A on the cell surface. The fact that the monomeric RET/MEN 2B was not affected suggests that D4 acts by interfering with the formation of a stable, active RET dimer (263). Several compounds obtained by systematic evolution of ligands by exponential enrichment are currently under clinical trials (264). However, the efficacy of D4 as a therapy for RET-associated tumors needs to be established.

### E. Autophosphorylation: tyrosine kinase inhibitors

Dimerization of the receptor due to ligand activation or mutations results in autophosphorylation of the tyrosine kinase domain. Although tyrosine kinases play a critical role in diverse physiological processes, recent successes in targeting a variety of tyrosine kinases in cancer (265) have drawn attention to RET as a possible therapeutic target. The role of RET in oncogenesis is emphasized by its unique function in the development and growth of neuroendocrine tumors and the fact that expression of oncogenic RET alone is enough to transform NIH3T3 fibroblasts; therefore, RET seems an obvious target for intervention (205, 266).

The emergence of imatinib (signal transduction inhibitor 571) as a prototype of designer tyrosine kinase inhibitors demonstrated that tyrosine kinase inhibition can be rather specific and effective. Imatinib belongs to the 2-phenylamino-pyrimidine class and proved to target constitutive active breakpoint cluster region-Abelson murine leukemia viral oncogene homolog (BCR-ABL), PDGFR, and SCFR (stem cell



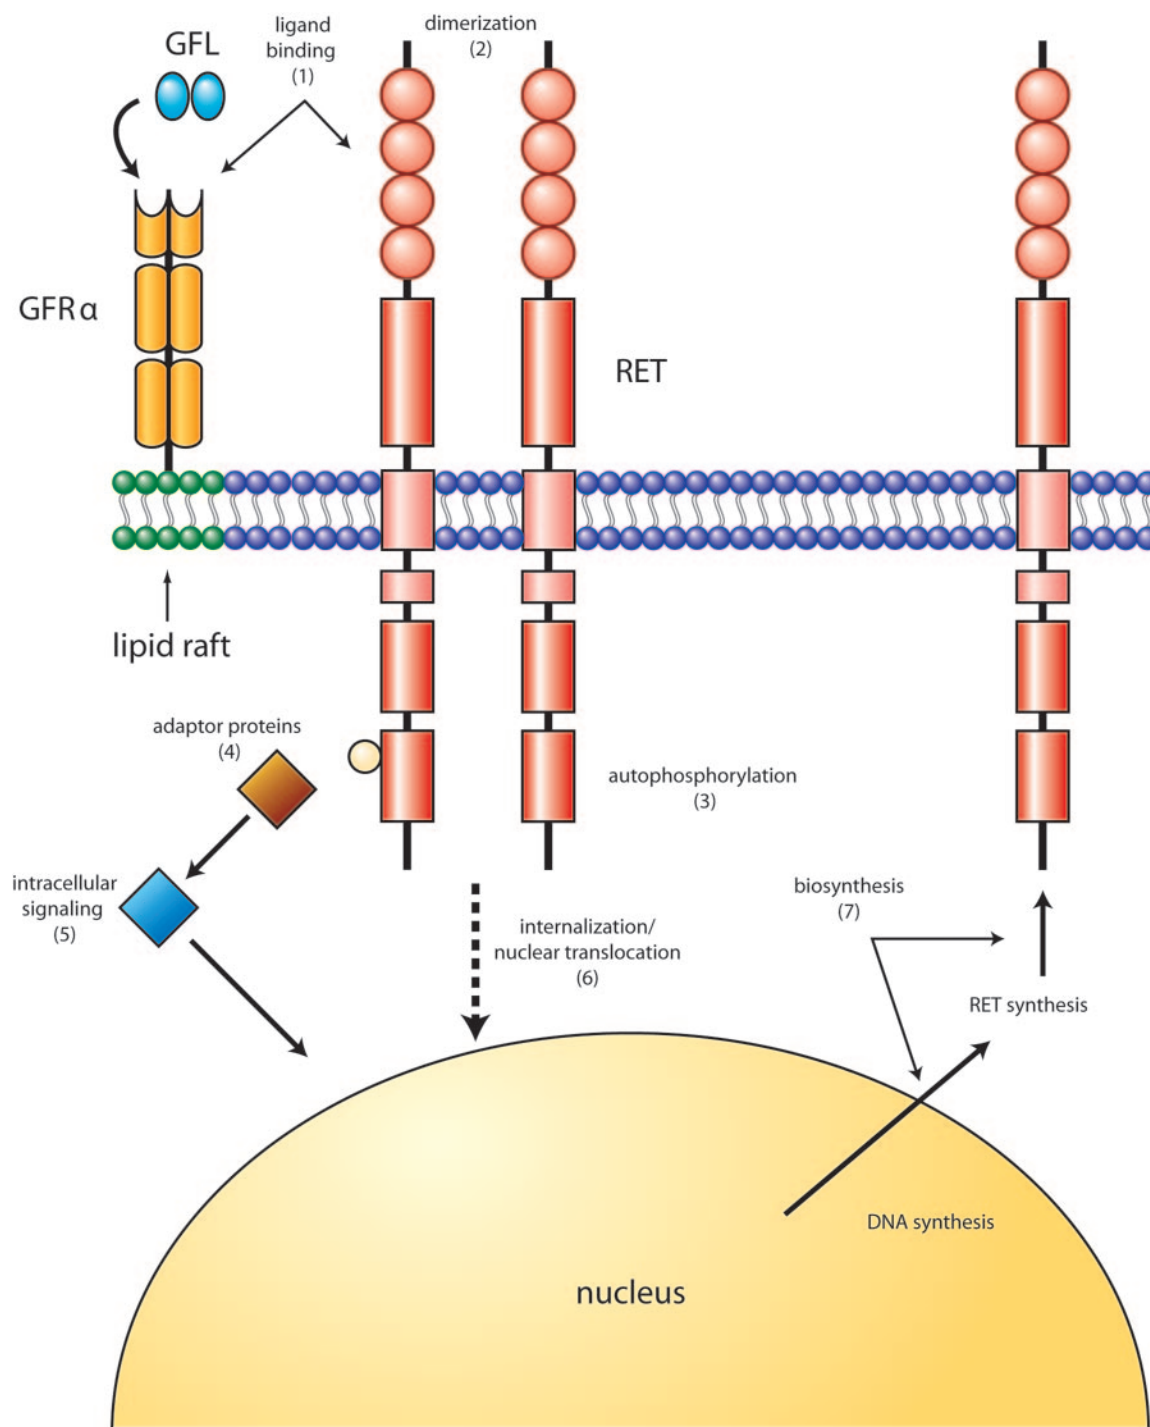

FIG. 6. Strategies to inhibit RET. The different steps involved in RET activation, regulation, and synthesis are schematically depicted. Each step is associated with a potential means of inhibition for therapy. 1, Ligand binding and formation of ligand-GFR complex (antagonists, antibodies); 2, receptor dimerization (inhibitors); 3, autophosphorylation (tyrosine kinase inhibitors); 4, recruitment of adaptor proteins (phosphatases, inhibitors of protein-protein interaction); 5, intracellular signaling (various inhibitors); 6, internalization and nuclear translocation (antibodies, inhibitors); and 7, biosynthesis (gene therapy, RNAi).

factor receptor, also called c-kit) tyrosine kinases. Currently, imatinib is clinically used to treat chronic myelogenous leukemia and gastrointestinal stromal tumors as well as dermatofibrosarcoma protuberans (265, 267, 268). Therefore, and because of similarities between RET and, for instance,

c-kit, there is a rationale to select tyrosine kinase inhibitors for treatment of RET-mediated endocrine tumors.

Over the last several years, a couple of tyrosine kinase inhibitors have been demonstrated to inhibit RET activity. Imatinib has been shown to display inhibitory activity

against RET/MEN 2A and RET/MEN 2B in MTC-derived cell lines. Furthermore, it induces RET oncoprotein degradation. However, the  $IC_{50}$  (the concentration that causes 50% growth inhibition) of imatinib necessary to inhibit RET *in vitro* is high (25–37  $\mu M$ ). Hence, it is impossible to conclude that imatinib will be a good candidate for systemic therapy of MTC (269–271).

The 2-indolinone derivative ribose-5-phosphate isomerase (RPI-1) inhibited RET in human TT cells (a MTC-derived cell line harboring a RET<sup>C634W</sup> mutation) and RET/MEN 2A and RET/PTC1-expressing NIH3T3 cells with an  $IC_{50}$  in the low micromolar range. RPI-1 decreased activation of downstream molecules including PLC $\gamma$ , ERK, and AKT and reduced proliferation. RPI-1 also showed antitumor effects in nude mice and could be administered orally (272–274). The closely related compound SU11248 (sunitinib) is also a highly active inhibitor of RET and is currently evaluated in clinical trials for gastrointestinal stromal tumors and renal cell carcinoma (124, 275).

The pyrazolopyrimidines PP1 and PP2 inhibited enzymatic activity and transforming ability of NIH3T3 fibroblasts transfected with almost all types of RET/MEN 2A and RET/MEN 2B as well as RET/PTC1 and RET/PTC3 with an  $IC_{50}$  in the nanomolar range (276–279). However, PP1 and PP2 also inhibit the Src family of kinases. Therefore, the actions of PP1 and PP2 on oncogenic activity may not depend solely on RET inhibition. PP1 induces RET/MEN 2A and RET/MEN 2B oncoprotein degradation via proteasomal targeting (278), whereas imatinib induces RET degradation through nonproteasomal pathways (271). In addition, the pyrrolopyrimidine AEE788, which is a potent inhibitor ( $IC_{50}$  in the low nanomolar range) of VEGFR and epidermal growth factor receptor, has a RET  $IC_{50}$  of 740 nM (280).

The indolocarbazole derivatives CEP-701 and CEP-751 inhibited RET autophosphorylation and proliferation of TT cells at concentrations lower than 100 nM. Moreover CEP-751 inhibited tumor growth in nude mice that have been injected with TT cells (281).

The selective inhibitor of the VEGFR-2 tyrosine kinase ZD6474 is a member of the anilinoquinazoline family. ZD6474 targets the enzymatic activity of both MEN 2 and PTC-related oncogenic RET and has an  $IC_{50}$  of 100 nM. In addition, the compound inhibits tumor growth in RET/PTC-transformed NIH3T3 cell xenografts (282). Because ZD6474 inhibits the VEGFR-2, it has antiangiogenic capacities as well. Moreover, it has proven to have few side effects despite the lack of selectivity for a certain kinase (283). The preliminary results of an ongoing phase II study with ZD6474 in hereditary MTC are encouraging (284), and further data will be awaited.

Due to their powerful inhibitory effects, RPI-1, SU11248, PP1, PP2, AEE768, ZD6474, CEP-701, and CEP-751 seem a promising treatment strategy in RET-associated cancer. Other small molecule tyrosine kinase inhibitors with affinity for RET are expected to emerge in the near future.

Although most of the tyrosine kinase inhibitors examined lack selectivity for RET (or any other kinase), adverse effects are generally acceptably low and manageable. Therefore, tyrosine kinase inhibitors might soon become the therapy of choice for RET-associated thyroid cancer. However, resis-

tance to tyrosine kinase inhibitors may occur due to mutation and amplification of the target kinase, which leads to interference with binding of the inhibitor. In RET, replacing valine at codon 804 with the amino acids leucine or methionine indeed mediated resistance to pyrazolopyrimidines and anilinoquinazolines (279). Combining different (kinase) inhibitors may overcome this resistance.

#### F. Recruitment of adaptor proteins: phosphatases

Activation of phosphatases leading to accelerated removal of substrate phosphates has been demonstrated to counter kinase signaling (285). It has been shown that Src homology 2-containing protein tyrosine phosphatase-1, a cytoplasmic protein phosphotyrosine phosphatase, can associate with mutated RET, reducing its autophosphorylation rate, with consequent suppression of the growth-promoting signals by the RET-induced MAPK pathway (286, 287). This reduction in autophosphorylation is activated by somatotropin release-inhibiting factor (287). In light of these results, Src homology 2-containing protein tyrosine phosphatase-1 could represent a molecular target for future treatment of RET-associated cancer.

#### G. Intracellular signaling: inhibitors

Activated tyrosine kinases induce numerous downstream events and initiate different signaling pathways (Fig. 3). Specific key proteins (often kinases) involved in these pathways can be inhibited, resulting in modulation of the effects caused by the (mutant) tyrosine kinase. Several inhibitors can target the RAS/Ras effectors serine/threonine kinase (RAF)/MEK/ERK pathway for instance, which is involved in cell proliferation and differentiation. Several of these agents are under clinical evaluation in tyrosine kinase-associated human cancer (for review, see Refs. 288 and 289), although none of these agents has yet been investigated for RET. Of particular interest in RET-associated tumors is the biaryl urea BAY 43–9006 (sorafenib). BAY 43–9006 is an oral multikinase inhibitor initially developed as a specific inhibitor of BRAF. However, subsequent studies revealed that BAY 43–9006 also inhibits other kinases including VEGFR-2, VEGFR-3, PDGFR- $\beta$ , c-kit, and FMS-like tyrosine kinase 3 (FLT-3). In addition, the compound also inhibits RET (290). Recently, it was demonstrated that BRAF is a key mediator of the intracellular signaling of oncogenic RET in follicular thyroid cells (122). The simultaneous action at two levels of the same signaling pathway (RET and BRAF) in endocrine tumors may offer perspective and a potential mechanism to circumvent the development of treatment resistance.

Other agents that interfere with the RAS/RAF/MEK/ERK pathway can be functionally characterized as inhibitors of RAS expression (antisense oligodeoxynucleotides), RAS processing (prenyltransferase inhibitors), and inhibitors of downstream effectors of RAF and MEK (small molecule inhibitors).

RAS [or any other gene, such as RAF and PKC (288)] expression can be altered at the transcriptional stage by use of oligonucleotides that cause the formation of triple helices. An alternative strategy is to use single-stranded oligonucle-

otides, or antisense oligonucleotides, to modify gene expression at the translational step. LY900003 (Affinitak) is an antisense oligonucleotide, known to modify PKC expression by interacting with the mRNA involved in the production of disease-specific proteins and is currently in advanced clinical development (288). However, antisense therapeutics have shortcomings in specificity and consistency (291).

Many prenylated proteins are involved in signal transduction circuits whose dysfunction leads to cancer, including RAS. RAS proteins require posttranslational modification by prenylation to be biologically active. Prenyltransferase inhibitors have some antitumor activity in the clinic, but the antitumor activity cannot be ascribed simply to inhibition of RAS (292). Therefore, the crucial targets of prenyltransferase inhibitors remain to be identified.

Inhibitors of other downstream signal transduction proteins thus far have not been tested in RET signaling. Nevertheless, they provide interesting possibilities for future research and therapeutic options in RET-associated endocrine malignancies. A potential objective for intervention is the PI3K/AKT pathway responsible for proliferation, differentiation, and cell survival. The involvement of this pathway in oncogenesis is reviewed by Vivanco and Sawyers (293). A downstream substrate of AKT is mTOR, which is involved in the translation of growth regulatory gene products (294). mTOR integrates input from multiple upstream pathways and inhibition of mTOR (via the immunosuppressive drug rapamycin and its derivatives) results in cell cycle arrest and growth inhibition in a variety of human tumor systems (295).

The PLC $\gamma$ /PKC cascade is targeted by several kinase inhibitors, antisense oligonucleotides, and staurosporine analogs (288). Although these classes of inhibitors have minimal single-agent activity, they can be administered safely with conventional chemotherapeutic regimens, and they have an additional antitumor effect in various human cancers (289, 296).

Several compounds containing platinum (297) as well as natural products (298) block STAT3 activity *in vitro* and *in vivo* at low micromolar concentrations. In malignant cells that harbor constitutively activated STAT3, these compounds inhibit cell growth and induce apoptosis. By contrast, cells that do not contain persistent STAT3 activity are marginally affected or are not affected (297, 298). Whether these STAT3 inhibitors are useful in clinical practice is not yet established.

JNK can be inhibited by the selective JNK inhibitor SP600125. JNK inhibition seems to lead to cell cycle arrest and CD95 mediated apoptosis, but the concentrations of inhibitor needed to achieve this effect are fairly high (299).

#### H. Internalization and nuclear translocation: antibodies

In an analogy of the successes of the monoclonal antibody trastuzumab (Herceptin) in breast cancer (300), targeting RET with a monoclonal antibody seems to be useful for MTC and PTC patients. Yano *et al.* (301) have already generated an antibody that is capable of internalization of RET, but its efficacy remains to be shown.

#### I. Biosynthesis: gene therapeutic and antisense approaches

Fascinating new viewpoints for treatment of MTC have been opened by novel gene therapeutic approaches. Gene therapy involves the integration of new genetic material into the genome. This approach can be used to replace defective genes or block the effects of unwanted ones by the introduction of a counteracting gene.

Inhibition of oncogenic RET signaling by expression of a dominant-negative RET mutant is an example of corrective gene therapy and has been investigated by Drosten *et al.* (302, 303). Adenoviral vectors expressing dominant-negative RET mutants were used. Because of amino acid changes in the cadherin domains of these dominant-negative RET mutants, the glycosylation process is disturbed, resulting in interference with protein transport to the cell surface. In addition, the dominant-negative mutants dimerize with oncogenic RET in the endoplasmic reticulum, thereby preventing expression of both dominant-negative and oncogenic RET on the cell surface. Using an adenoviral vector expressing dominant-negative RET leads to strong inhibition of cell viability caused by induction of apoptosis *in vitro*. Moreover, expressing the dominant-negative RET mutant *in vivo* in TT cells in nude mice led to prolonged survival, whereas inoculation of *ex vivo* transduced TT cells in nude mice led to complete suppression of tumor growth (303). Introduction of a mutant RET selective ribozyme (a RNA molecule capable of sequence-specific cleavage of other RNA molecules) that specifically cleaves mutant RET RNA and blocks RET-mediated cell growth and transformation may be another gene therapeutic approach (304).

Using adenoviral or retroviral vectors, small double-stranded RNA molecules (small interfering RNA) induce specific degradation of mRNA through complementary base pairing. Consequently, small interfering RNA molecules silence gene expression in mammalian cell culture as well as in animal models (305). Moreover, it seems that RNA interference (RNAi) can also serve as a tool to down-regulate chimeric fusion transcripts (305). RNAi offers a new way to inactivate genes of interest. It would be appealing to test the activity of RNAi and ribozyme-based gene therapy on clinically relevant models of RET-associated tumors.

The main challenge to any gene therapy, however, is to reach the tumor cells efficiently (71). The inhibition of oncogenic RET expression requires high levels of *in vivo* transduction efficiency, thereby limiting its therapeutic efficacy (302).

#### IX. Conclusion

In 20 yr, the critical role of RET in the growth of endocrine tumors has been well recognized. Soon after the discovery that the RET gene was responsible for MEN 2 and FMTC, genetic testing to treat patients with prophylactic thyroidectomy was applied, and recently, mutation-based treatment recommendations have been described. Despite the clear genotype-phenotype correlation in MEN 2, the molecular mechanisms linking the receptor with the (variable) disease phenotypes remain to be unraveled. In contrast to PTC, which has good adjuvant treatment, surgery remains the



only treatment with curative intent in MEN 2 related tumors, FMTc, and sporadic MTC and pheochromocytoma. Therefore, new treatment options are needed for patients with disseminated PTC and for patients with disseminated MTC or pheochromocytoma. Although numerous studies provided evidence that RET is a potential target for selective cancer therapy, a clinically useful therapeutic option for treating patients with RET-associated cancer is still not available.

### Acknowledgments

Address all correspondence and requests for reprints to: R. M. W. Hofstra, Ph.D., Department of Genetics, University Medical Center Groningen, University of Groningen, Hanzeplein 1, Postbus 30 001, 9700 RB Groningen. E-mail: r.m.w.hofstra@medgen.umcg.nl

Disclosure statement: the authors have nothing to disclose.

### References

- Vlahovic G, Crawford J 2003 Activation of tyrosine kinases in cancer. *Oncologist* 8:531–538
- Blume-Jensen P, Hunter T 2001 Oncogenic kinase signalling. *Nature* 411:355–365
- Pachnis V, Mankoo B, Costantini F 1993 Expression of the c-ret proto-oncogene during mouse embryogenesis. *Development* 119:1005–1017
- Schuchardt A, D'Agati V, Larsson-Blomberg L, Costantini F, Pachnis V 1994 Defects in the kidney and enteric nervous system of mice lacking the tyrosine kinase receptor RET. *Nature* 367:380–383
- Airaksinen MS, Saarma M 2002 The GDNF family: signalling, biological functions and therapeutic value. *Nat Rev Neurosci* 3:383–394
- Manie S, Santoro M, Fusco A, Billaud M 2001 The RET receptor: function in development and dysfunction in congenital malformation. *Trends Genet* 17:580–589
- Santoro M, Rosati R, Grieco M, Berlingieri MT, D'Amato GL, de Francisci V, Fusco A 1990 The ret proto-oncogene is consistently expressed in human pheochromocytomas and thyroid medullary carcinomas. *Oncogene* 5:1595–1598
- Ikeda I, Ishizaka Y, Tahira T, Suzuki T, Onda M, Sugimura T, Nagao M 1990 Specific expression of the ret proto-oncogene in human neuroblastoma cell lines. *Oncogene* 5:1291–1296
- Cheung CC, Ezzat S, Ramyar L, Freeman JL, Asa SL 2000 Molecular basis of Hurthle cell papillary thyroid carcinoma. *J Clin Endocrinol Metab* 85:878–882
- Takahashi M, Ritz J, Cooper GM 1985 Activation of a novel human transforming gene, RET, by DNA rearrangement. *Cell* 42:581–588
- Pasini B, Hofstra RM, Yin L, Boccardi R, Santamaria G, Grootscholten PM, Ceccherini I, Patrone G, Priolo M, Buys CH, Romeo G 1995 The physical map of the human RET proto-oncogene. *Oncogene* 11:1737–1743
- Anders J, Kjar S, Ibanez CF 2001 Molecular modeling of the extracellular domain of the RET receptor tyrosine kinase reveals multiple cadherin-like domains and a calcium-binding site. *J Biol Chem* 276:35808–35817
- Takahashi M, Buma Y, Taniguchi M 1991 Identification of the ret proto-oncogene products in neuroblastoma and leukemia cells. *Oncogene* 6:297–301
- Takahashi M, Asai N, Iwashita T, Isomura T, Miyazaki K, Matsuyama M 1993 Characterization of the RET proto-oncogene products expressed in mouse L cells. *Oncogene* 8:2925–2929
- Myers SM, Eng C, Ponder BA, Mulligan LM 1995 Characterization of RET proto-oncogene 3' splicing variants and polyadenylation sites: a novel C-terminus for RET. *Oncogene* 11:2039–2045
- Airaksinen MS, Titievsky A, Saarma M 1999 GDNF family neurotrophic factor signaling: four masters, one servant? *Mol Cell Neurosci* 13:313–325
- Yu T, Scully S, Yu Y, Fox GM, Jing S, Zhou R 1998 Expression of GDNF family receptor components during development: implications in the mechanisms of interaction. *J Neurosci* 18:4684–4696
- Jing S, Wen D, Yu Y, Holst PL, Luo Y, Fang M, Tamir R, Antonio L, Hu Z, Cupples R, Louis JC, Hu S, Altrock BW, Fox GM 1996 GDNF-induced activation of the RET protein tyrosine kinase is mediated by GDNFR- $\alpha$ , a novel receptor for GDNF. *Cell* 85:1113–1124
- Baloh RH, Enomoto H, Johnson Jr EM, Milbrandt J 2000 The GDNF family ligands and receptors: implications for neural development. *Curr Opin Neurobiol* 10:103–110
- Kjaer S, Ibanez CF 2003 Identification of a surface for binding to the GDNF-GFR  $\alpha$ 1 complex in the first cadherin-like domain of RET. *J Biol Chem* 278:47898–47904
- Paratcha G, Ledda F, Baars L, Couplier M, Besset V, Anders J, Scott R, Ibanez CF 2001 Released GFR $\alpha$ 1 potentiates downstream signaling, neuronal survival, and differentiation via a novel mechanism of recruitment of c-Ret to lipid rafts. *Neuron* 29:171–184
- Tsui-Pierchala BA, Encinas M, Milbrandt J, Johnson Jr EM 2002 Lipid rafts in neuronal signaling and function. *Trends Neurosci* 25:412–417
- Simons K, Toomre D 2000 Lipid rafts and signal transduction. *Nat Rev Mol Cell Biol* 1:31–39
- Tansey MG, Baloh RH, Milbrandt J, Johnson Jr EM 2000 GFR $\alpha$ -mediated localization of RET to lipid rafts is required for effective downstream signaling, differentiation, and neuronal survival. *Neuron* 25:611–623
- Encinas M, Tansey MG, Tsui-Pierchala BA, Comella JX, Milbrandt J, Johnson Jr EM 2001 c-Src is required for glial cell line-derived neurotrophic factor (GDNF) family ligand-mediated neuronal survival via a phosphatidylinositol-3 kinase (PI-3K)-dependent pathway. *J Neurosci* 21:1464–1472
- Kato M, Takeda K, Kawamoto Y, Iwashita T, Akhand AA, Senga T, Yamamoto M, Sobue G, Hamaguchi M, Takahashi M, Nakashima I 2002 Repair by Src kinase of function-impaired RET with multiple endocrine neoplasia type 2A mutation with substitutions of tyrosines in the COOH-terminal kinase domain for phenylalanine. *Cancer Res* 62:2414–2422
- Yang J, Lindahl M, Lindholm P, Virtanen H, Coffey E, Runeberg-Roos P, Saarma M 2004 PSPN/GFR $\alpha$ 4 has a significantly weaker capacity than GDNF/GFR $\alpha$ 1 to recruit RET to rafts, but promotes neuronal survival and neurite outgrowth. *FEBS Lett* 569:267–271
- Couplier M, Anders J, Ibanez CF 2002 Coordinated activation of autophosphorylation sites in the RET receptor tyrosine kinase: importance of tyrosine 1062 for GDNF mediated neuronal differentiation and survival. *J Biol Chem* 277:1991–1999
- Tsui-Pierchala BA, Milbrandt J, Johnson Jr EM 2002 NGF utilizes c-Ret via a novel GFL-independent, inter-RTK signaling mechanism to maintain the trophic status of mature sympathetic neurons. *Neuron* 33:261–273
- Liu X, Vega QC, Decker RA, Pandey A, Worby CA, Dixon JE 1996 Oncogenic RET receptors display different autophosphorylation sites and substrate binding specificities. *J Biol Chem* 271:5309–5312
- Santoro M, Carlomagno F, Melillo RM, Fusco A 2004 Dysfunction of the RET receptor in human cancer. *Cell Mol Life Sci* 61:2954–2964
- Ichihara M, Murakumo Y, Takahashi M 2004 RET and neuroendocrine tumors. *Cancer Lett* 204:197–211
- Fukuda T, Kiuchi K, Takahashi M 2002 Novel mechanism of regulation of Rac activity and lamellipodia formation by RET tyrosine kinase. *J Biol Chem* 277:19114–19121
- Lin TS, Mahajan S, Frank DA 2000 STAT signaling in the pathogenesis and treatment of leukemias. *Oncogene* 19:2496–2504
- Schuringa JJ, Wojtacki K, Hagens W, Vellenga E, Buys CH, Hofstra RM, Kruijer W 2001 MEN2A-RET-induced cellular transformation by activation of STAT3. *Oncogene* 20:5350–5358
- Plaza Menacho I, Koster R, van der Sloot AM, Quax WJ, Osinga J, van der Sluis T, Hollema H, Burzynski GM, Gimm O, Buys CH, Eggen BJ, Hofstra RM 2005 RET-familial medullary thyroid carcinoma mutants Y791F and S891A activate a Src/JAK/STAT3 pathway, independent of glial cell line-derived neurotrophic factor. *Cancer Res* 65:1729–1737

37. Iwashita T, Asai N, Murakami H, Matsuyama M, Takahashi M 1996 Identification of tyrosine residues that are essential for transforming activity of the RET proto-oncogene with MEN2A or MEN2B mutation. *Oncogene* 12:481–487
38. Kawamoto Y, Takeda K, Okuno Y, Yamakawa Y, Ito Y, Taguchi R, Kato M, Suzuki H, Takahashi M, Nakashima I 2004 Identification of RET autophosphorylation sites by mass spectrometry. *J Biol Chem* 279:14213–14224
39. Encinas M, Crowder RJ, Milbrandt J, Johnson Jr EM 2004 Tyrosine 981, a novel RET autophosphorylation site, binds c-Src to mediate neuronal survival. *J Biol Chem* 279:18262–18269
40. Panta GR, Nwariaku F, Kim LT 2004 RET signals through focal adhesion kinase in medullary thyroid cancer cells. *Surgery* 136:1212–1217
41. McLean GW, Carragher NO, Avizienyte E, Evans J, Brunton VG, Frame MC 2005 The role of focal-adhesion kinase in cancer: a new therapeutic opportunity. *Nat Rev Cancer* 5:505–515
42. Borrello MG, Alberti L, Arighi E, Bongarzone I, Battistini C, Bardelli A, Pasini B, Piutti C, Rizzetti MG, Mondellini P, Radice MT, Pierotti MA 1996 The full oncogenic activity of Ret/ptc2 depends on tyrosine 539, a docking site for phospholipase C $\gamma$ . *Mol Cell Biol* 16:2151–2163
43. Knauf JA, Ouyang B, Croyle M, Kimura E, Fagin JA 2003 Acute expression of RET/PTC induces isozyme-specific activation and subsequent downregulation of PKC $\epsilon$  in PCCL3 thyroid cells. *Oncogene* 22:6830–6838
44. Andreozzi F, Melillo RM, Carlomagno F, Oriente F, Miele C, Fiory F, Santopietro S, Castellone MD, Beguinot F, Santoro M, Formisano P 2003 Protein kinase C $\alpha$  activation by RET: evidence for a negative feedback mechanism controlling RET tyrosine kinase. *Oncogene* 22:2942–2949
45. Nozaki C, Asai N, Murakami H, Iwashita T, Iwata Y, Horibe K, Klein RD, Rosenthal A, Takahashi M 1998 Calcium-dependent Ret activation by GDNF and neurturin. *Oncogene* 16:293–299
46. van Weering DH, Moen TC, Braakman I, Baas PD, Bos JL 1998 Expression of the receptor tyrosine kinase Ret on the plasma membrane is dependent on calcium. *J Biol Chem* 273:12077–12081
47. Asai N, Murakami H, Iwashita T, Takahashi M 1996 A mutation at tyrosine 1062 in MEN2A-Ret and MEN2B-Ret impairs their transforming activity and association with Shc adaptor proteins. *J Biol Chem* 271:17644–17649
48. Segouffin-Cariou C, Billaud M 2000 Transforming ability of MEN2A-RET requires activation of the phosphatidylinositol 3-kinase/AKT signaling pathway. *J Biol Chem* 275:3568–3576
49. Murakami H, Iwashita T, Asai N, Shimono Y, Iwata Y, Kawai K, Takahashi M 1999 Enhanced phosphatidylinositol 3-kinase activity and high phosphorylation state of its downstream signalling molecules mediated by RET with the MEN 2B mutation. *Biochem Biophys Res Commun* 262:68–75
50. Alberti L, Borrello MG, Ghizzoni S, Torriti F, Rizzetti MG, Pierotti MA 1998 Grb2 binding to the different isoforms of Ret tyrosine kinase. *Oncogene* 17:1079–1087
51. Scott RP, Eketjall S, Aineskog H, Ibanez CF 2005 Distinct turnover of alternatively spliced isoforms of the RET kinase receptor mediated by differential recruitment of the Cbl ubiquitin ligase. *J Biol Chem* 280:13442–13449
52. Pellicci G, Troglia F, Bodini A, Melillo RM, Pettirossi V, Coda L, De Giuseppe A, Santoro M, Pellicci PG 2002 The neuron-specific Rai (ShcC) adaptor protein inhibits apoptosis by coupling Ret to the phosphatidylinositol 3-kinase/Akt signaling pathway. *Mol Cell Biol* 22:7351–7363
53. Melillo RM, Carlomagno F, De Vita G, Formisano P, Vecchio G, Fusco A, Billaud M, Santoro M 2001 The insulin receptor substrate (IRS)-1 recruits phosphatidylinositol 3-kinase to Ret: evidence for a competition between Shc and IRS-1 for the binding to Ret. *Oncogene* 20:209–218
54. Takahashi M 2001 The GDNF/RET signaling pathway and human diseases. *Cytokine Growth Factor Rev* 12:361–373
55. Murakami H, Iwashita T, Asai N, Iwata Y, Narumiya S, Takahashi M 1999 Rho-dependent and -independent tyrosine phosphorylation of focal adhesion kinase, paxillin and p130Cas mediated by Ret kinase. *Oncogene* 18:1975–1982
56. Hayashi H, Ichihara M, Iwashita T, Murakami H, Shimono Y, Kawai K, Kurokawa K, Murakumo Y, Imai T, Funahashi H, Nakao A, Takahashi M 2000 Characterization of intracellular signals via tyrosine 1062 in RET activated by glial cell line-derived neurotrophic factor. *Oncogene* 19:4469–4475
57. Kurokawa K, Iwashita T, Murakami H, Hayashi H, Kawai K, Takahashi M 2001 Identification of SNT/FRS2 docking site on RET receptor tyrosine kinase and its role for signal transduction. *Oncogene* 20:1929–1938
58. Melillo RM, Santoro M, Ong SH, Billaud M, Fusco A, Hadari YR, Schlessinger J, Lax I 2001 Docking protein FRS2 links the protein tyrosine kinase RET and its oncogenic forms with the mitogen-activated protein kinase signaling cascade. *Mol Cell Biol* 21:4177–4187
59. Watanabe T, Ichihara M, Hashimoto M, Shimono K, Shimoyama Y, Nagasaka T, Murakumo Y, Murakami H, Sugiura H, Iwata H, Ishiguro N, Takahashi M 2002 Characterization of gene expression induced by RET with MEN2A or MEN2B mutation. *Am J Pathol* 161:249–256
60. Xia Y, Karin M 2004 The control of cell motility and epithelial morphogenesis by Jun kinases. *Trends Cell Biol* 14:94–101
61. Kennedy NJ, Davis RJ 2003 Role of JNK in tumor development. *Cell Cycle* 2:199–201
62. Murakami H, Yamamura Y, Shimono Y, Kawai K, Kurokawa K, Takahashi M 2002 Role of Dok1 in cell signaling mediated by RET tyrosine kinase. *J Biol Chem* 277:32781–32790
63. Grimm J, Sachs M, Britsch S, Di Cesare S, Schwarz-Romond T, Alitalo K, Birchmeier W 2001 Novel p62dok family members, dok-4 and dok-5, are substrates of the c-Ret receptor tyrosine kinase and mediate neuronal differentiation. *J Cell Biol* 154:345–354
64. Schuetz G, Rosario M, Grimm J, Boeckers TM, Gundelfinger ED, Birchmeier W 2004 The neuronal scaffold protein Shank3 mediates signaling and biological function of the receptor tyrosine kinase Ret in epithelial cells. *J Cell Biol* 167:945–952
65. Durick K, Gill GN, Taylor SS 1998 Shc and Enigma are both required for mitogenic signaling by Ret/ptc2. *Mol Cell Biol* 18:2298–2308
66. Hayashi Y, Iwashita T, Murakami H, Kato Y, Kawai K, Kurokawa K, Tohnai I, Ueda M, Takahashi M 2001 Activation of BMK1 via tyrosine 1062 in RET by GDNF and MEN2A mutation. *Biochem Biophys Res Commun* 281:682–689
67. Ludwig L, Kessler H, Hoang-Vu C, Dralle H, Adler G, Boehm BO, Schmid RM 2003 Grap-2, a novel RET binding protein, is involved in RET mitogenic signaling. *Oncogene* 22:5362–5366
68. Kim DW, Hwang JH, Suh JM, Kim H, Song JH, Hwang ES, Hwang IY, Park KC, Chung HK, Kim JM, Park J, Hemmings BA, Shong M 2003 RET/PTC (rearranged in transformation/papillary thyroid carcinomas) tyrosine kinase phosphorylates and activates phosphoinositide-dependent kinase 1 (PDK1): an alternative phosphatidylinositol 3-kinase-independent pathway to activate PDK1. *Mol Endocrinol* 17:1382–1394
69. Ledda F, Paratcha G, Ibanez CF 2002 Target-derived GFR $\alpha$ 1 as an attractive guidance signal for developing sensory and sympathetic axons via activation of Cdk5. *Neuron* 36:387–401
70. Komminoth P, Roth J, Muletta-Feurer S, Saremaslani P, Seelentag WK, Heitz PU 1996 RET proto-oncogene point mutations in sporadic neuroendocrine tumors. *J Clin Endocrinol Metab* 81:2041–2046
71. Guo ZS, Bartlett DL 2004 Vaccinia as a vector for gene delivery. *Expert Opin Biol Ther* 4:901–917
72. Jain S, Watson MA, DeBenedetti MK, Hiraki Y, Moley JF, Milbrandt J 2004 Expression profiles provide insights into early malignant potential and skeletal abnormalities in multiple endocrine neoplasia type 2B syndrome tumors. *Cancer Res* 64:3907–3913
73. Arighi E, Borrello MG, Sariola H 2005 RET tyrosine kinase signaling in development and cancer. *Cytokine Growth Factor Rev* 16:441–467
74. Iwashita T, Kato M, Murakami H, Asai N, Ishiguro Y, Ito S, Iwata Y, Kawai K, Asai M, Kurokawa K, Kajita H, Takahashi M 1999 Biological and biochemical properties of Ret with kinase domain mutations identified in multiple endocrine neoplasia type 2B and familial medullary thyroid carcinoma. *Oncogene* 18:3919–3922
75. de Graaff E, Srinivas S, Kilkenny C, D'Agati V, Mankoo BS, Costantini F, Pachnis V 2001 Differential activities of the RET



- tyrosine kinase receptor isoforms during mammalian embryogenesis. *Genes Dev* 15:2433–2444
76. Sherman SI, Angelos P, Ball DW, Beenken SW, Byrd D, Clark OH, Daniels GH, Dilawari RA, Ehya H, Farrar WB, Gagel RF, Kandeel F, Kloos RT, Kopp P, Lamonica DM, Loree TR, Lydiatt WM, McCaffrey J, Olson Jr JA, Ridge JA, Robbins R, Shah JP, Sisson JC, Thompson NW 2005 Thyroid carcinoma. *J Natl Compr Canc Netw* 3:404–457
  77. Fagin JA 2002 Minireview: branded from the start: distinct oncogenic initiating events may determine tumor fate in the thyroid. *Mol Endocrinol* 16:903–911
  78. Xing M 2005 BRAF mutation in thyroid cancer. *Endocr Relat Cancer* 12:245–262
  79. Wasenius VM, Hemmer S, Karjalainen-Lindsberg ML, Nuppenon NN, Franssila K, Joensuu H 2005 MET receptor tyrosine kinase sequence alterations in differentiated thyroid carcinoma. *Am J Surg Pathol* 29:544–549
  80. Links TP, van Tol KM, Meerman GJ, de Vries EG 2001 Differentiated thyroid carcinoma: a polygenic disease. *Thyroid* 11:1135–1140
  81. Pierotti MA, Vigneri P, Bongarzone I 1998 Rearrangements of RET and NTRK1 tyrosine kinase receptors in papillary thyroid carcinomas. *Recent Results Cancer Res* 154:237–247
  82. Grieco M, Santoro M, Berlingieri MT, Melillo RM, Donghi R, Bongarzone I, Pierotti MA, Della Porta G, Fusco A, Vecchio G 1990 PTC is a novel rearranged form of the RET proto-oncogene and is frequently detected in vivo in human thyroid papillary carcinomas. *Cell* 60:557–563
  83. Nikiforova MN, Stringer JR, Blough R, Medvedovic M, Fagin JA, Nikiforov YE 2000 Proximity of chromosomal loci that participate in radiation-induced rearrangements in human cells. *Science* 290:138–141
  84. Smanik PA, Furminger TL, Mazzaferri EL, Jhiang SM 1995 Breakpoint characterization of the RET/PTC oncogene in human papillary thyroid carcinoma. *Hum Mol Genet* 4:2313–2318
  85. Tallini G, Asa SL 2001 RET oncogene activation in papillary thyroid carcinoma. *Adv Anat Pathol* 8:345–354
  86. Saenko V, Rogounovitch T, Shimizu-Yoshida Y, Abrosimov A, Lushnikov E, Roumiantsev P, Matsumoto N, Nakashima M, Meirmanov S, Ohtsuru A, Namba H, Tsyb A, Yamashita S 2003 Novel tumorigenic rearrangement,  $\Delta rfp/ret$ , in a papillary thyroid carcinoma from externally irradiated patient. *Mutat Res* 527:81–90
  87. Nikiforov YE 2002 RET/PTC rearrangement in thyroid tumors. *Endocr Pathol* 13:3–16
  88. Baloch ZW, Livolsi VA 2005 Pathologic diagnosis of papillary thyroid carcinoma: today and tomorrow. *Expert Rev Mol Diagn* 5:573–584
  89. Ito T, Seyama T, Iwamoto KS, Hayashi T, Mizuno T, Tsuyama N, Dohi K, Nakamura N, Akiyama M 1993 In vitro irradiation is able to cause RET oncogene rearrangement. *Cancer Res* 53:2940–2943
  90. Fagin JA 2004 How thyroid tumors start and why it matters: kinase mutants as targets for solid cancer pharmacotherapy. *J Endocrinol* 183:249–256
  91. Goulko GM, Chepurny NI, Jacob P, Kairo IA, Likhtarev IA, Prohl G, Sobolev BG 1998 Thyroid dose and thyroid cancer incidence after the Chernobyl accident: assessments for the Zhytomyr region (Ukraine). *Radiat Environ Biophys* 36:261–273
  92. Jacob P, Goulko G, Heidenreich WF, Likhtarev I, Kairo I, Tronko ND, Bogdanova TI, Kenigsberg J, Buglova E, Drozdovitch V, Golovneva A, Demidchik EP, Balonov M, Zvonova I, Beral V 1998 Thyroid cancer risk to children calculated. *Nature* 392:31–32
  93. Williams D 2002 Cancer after nuclear fallout: lessons from the Chernobyl accident. *Nat Rev Cancer* 2:543–549
  94. Collins BJ, Chiappetta G, Schneider AB, Santoro M, Pentimalli F, Fogelfeld L, Gierlowski T, Shore-Freedman E, Jaffe G, Fusco A 2002 RET expression in papillary thyroid cancer from patients irradiated in childhood for benign conditions. *J Clin Endocrinol Metab* 87:3941–3946
  95. Santoro M, Melillo RM, Grieco M, Berlingieri MT, Vecchio G, Fusco A 1993 The TRK and RET tyrosine kinase oncogenes cooperate with ras in the neoplastic transformation of a rat thyroid epithelial cell line. *Cell Growth Differ* 4:77–84
  96. Jhiang SM, Sagartz JE, Tong Q, Parker-Thornburg J, Capen CC, Cho JY, Xing S, Ledent C 1996 Targeted expression of the ret/PTC1 oncogene induces papillary thyroid carcinomas. *Endocrinology* 137:375–378
  97. Santoro M, Chiappetta G, Cerrato A, Salvatore D, Zhang L, Manzo G, Picone A, Portella G, Santelli G, Vecchio G, Fusco A 1996 Development of thyroid papillary carcinomas secondary to tissue-specific expression of the RET/PTC1 oncogene in transgenic mice. *Oncogene* 12:1821–1826
  98. Powell Jr DJ, Russell J, Nibu K, Li G, Rhee E, Liao M, Goldstein M, Keane WM, Santoro M, Fusco A, Rothstein JL 1998 The RET/PTC3 oncogene: metastatic solid-type papillary carcinomas in murine thyroids. *Cancer Res* 58:5523–5528
  99. Sugg SL, Ezzat S, Rosen IB, Freeman JL, Asa SL 1998 Distinct multiple RET/PTC gene rearrangements in multifocal papillary thyroid neoplasia. *J Clin Endocrinol Metab* 83:4116–4122
  100. Cerilli LA, Mills SE, Rumpel CA, Dudley TH, Moskaluk CA 2002 Interpretation of RET immunostaining in follicular lesions of the thyroid. *Am J Clin Pathol* 118:186–193
  101. Tallini G, Santoro M, Helie M, Carlomagno F, Salvatore G, Chiappetta G, Carcangiu ML, Fusco A 1998 RET/PTC oncogene activation defines a subset of papillary thyroid carcinomas lacking evidence of progression to poorly differentiated or undifferentiated tumor phenotypes. *Clin Cancer Res* 4:287–294
  102. Santoro M, Papotti M, Chiappetta G, Garcia-Rostan G, Volante M, Johnson C, Camp RL, Pentimalli F, Monaco C, Herrero A, Carcangiu ML, Fusco A, Tallini G 2002 RET activation and clinicopathologic features in poorly differentiated thyroid tumors. *J Clin Endocrinol Metab* 87:370–379
  103. Puxeddu E, Moretti S, Giannico A, Martinelli M, Marino C, Avenia N, Cristofani R, Farabi R, Reboldi G, Ribacchi R, Pontecorvi A, Santeusano F 2003 Ret/PTC activation does not influence clinical and pathological features of adult papillary thyroid carcinomas. *Eur J Endocrinol* 148:505–513
  104. Cetta F, Pelizzo MR, Curia MC, Barbarisi A 1999 Genetics and clinicopathological findings in thyroid carcinomas associated with familial adenomatous polyposis. *Am J Pathol* 155:7–9
  105. Thomas GA, Bunnell H, Cook HA, Williams ED, Nerovnya A, Cherstvoy ED, Tronko ND, Bogdanova TI, Chiappetta G, Viglietto G, Pentimalli F, Salvatore G, Fusco A, Santoro M, Vecchio G 1999 High prevalence of RET/PTC rearrangements in Ukrainian and Belarussian post-Chernobyl thyroid papillary carcinomas: a strong correlation between RET/PTC3 and the solid-follicular variant. *J Clin Endocrinol Metab* 84:4232–4238
  106. Bongarzone I, Vigneri P, Mariani L, Collini P, Pilotti S, Pierotti MA 1998 RET/NTRK1 rearrangements in thyroid gland tumors of the papillary carcinoma family: correlation with clinicopathological features. *Clin Cancer Res* 4:223–228
  107. Basolo F, Giannini R, Monaco C, Melillo RM, Carlomagno F, Pancrazi M, Salvatore G, Chiappetta G, Pacini F, Elisei R, Miccoli P, Pinchera A, Fusco A, Santoro M 2002 Potent mitogenicity of the RET/PTC3 oncogene correlates with its prevalence in tall-cell variant of papillary thyroid carcinoma. *Am J Pathol* 160:247–254
  108. Sheils OM, O'earry JJ, Uhlmann V, Lattich K, Sweeney EC 2000 RET/PTC-1 activation in Hashimoto thyroiditis. *Int J Surg Pathol* 8:185–189
  109. Di Pasquale M, Rothstein JL, Palazzo JP 2001 Pathologic features of Hashimoto's-associated papillary thyroid carcinomas. *Hum Pathol* 32:24–30
  110. Nikiforova MN, Caudill CM, Biddinger P, Nikiforov YE 2002 Prevalence of RET/PTC rearrangements in Hashimoto's thyroiditis and papillary thyroid carcinomas. *Int J Surg Pathol* 10:15–22
  111. Corvi R, Lesueur F, Martinez-Alfaro M, Zini M, Decaussin M, Murat A, Romeo G 2001 RET rearrangements in familial papillary thyroid carcinomas. *Cancer Lett* 170:191–198
  112. Alsanea O, Wada N, Ain K, Wong M, Taylor K, Ituarte PH, Treseler PA, Weier HU, Freimer N, Siperstein AE, Duh QY, Takami H, Clark OH 2000 Is familial non-medullary thyroid carcinoma more aggressive than sporadic thyroid cancer? A multicenter series. *Surgery* 128:1043–1050
  113. Lesueur F, Stark M, Tocco T, Ayadi H, Delisle MJ, Goldgar DE, Schlumberger M, Romeo G, Canzian F 1999 Genetic heterogeneity in familial nonmedullary thyroid carcinoma: exclusion of linkage



- to RET, MNG1, and TCO in 56 families. NMTC Consortium. *J Clin Endocrinol Metab* 84:2157–2162
114. Yutan E, Clark OH 2001 Hurthle cell carcinoma. *Curr Treat Options Oncol* 2:331–335
115. Kushchayeva Y, Duh QY, Kebebew E, Clark OH 2004 Prognostic indications for Hurthle cell cancer. *World J Surg* 28:1266–1270
116. Hunt JL 2005 Unusual thyroid tumors: a review of pathologic and molecular diagnosis. *Expert Rev Mol Diagn* 5:725–734
117. Chiappetta G, Toti P, Cetta F, Giuliano A, Pentimalli F, Amendola I, Lazzi S, Monaco M, Mazzuchelli L, Tosi P, Santoro M, Fusco A 2002 The RET/PTC oncogene is frequently activated in oncocytic thyroid tumors (Hurthle cell adenomas and carcinomas), but not in oncocytic hyperplastic lesions. *J Clin Endocrinol Metab* 87:364–369
118. Musholt PB, Imkamp F, von Wasielewski R, Schmid KW, Musholt TJ 2003 RET rearrangements in archival oxyphilic thyroid tumors: new insights in tumorigenesis and classification of Hurthle cell carcinomas? *Surgery* 134:881–889
119. Bunone G, Uggeri M, Mondellini P, Pierotti MA, Bongarzone I 2000 RET receptor expression in thyroid follicular epithelial cell-derived tumors. *Cancer Res* 60:2845–2849
120. Pierotti MA, Bongarzone I, Borello MG, Greco A, Pilotti S, Sozzi G 1996 Cytogenetics and molecular genetics of carcinomas arising from thyroid epithelial follicular cells. *Genes Chromosomes Cancer* 16:1–14
121. Melillo RM, Cirafici AM, De Falco V, Bellantoni M, Chiappetta G, Fusco A, Carlomagno F, Picascia A, Tramontano D, Tallini G, Santoro M 2004 The oncogenic activity of RET point mutants for follicular thyroid cells may account for the occurrence of papillary thyroid carcinoma in patients affected by familial medullary thyroid carcinoma. *Am J Pathol* 165:511–521
122. Melillo RM, Castellone MD, Guarino V, De Falco V, Cirafici AM, Salvatore G, Caiazzo F, Basolo F, Giannini R, Kruhföffer M, Orntoft T, Fusco A, Santoro M 2005 The RET/PTC-RAS-BRAF linear signaling cascade mediates the motile and mitogenic phenotype of thyroid cancer cells. *J Clin Invest* 115:1068–1081
123. Ringel MD, Hayre N, Saito J, Saunier B, Schuppert F, Burch H, Bernet V, Burman KD, Kohn LD, Saji M 2001 Overexpression and overactivation of Akt in thyroid carcinoma. *Cancer Res* 61:6105–6111
124. Jung HS, Kim DW, Jo YS, Chung HK, Song JH, Park JS, Park KC, Park SH, Hwang JH, Jo KW, Shong M 2005 Regulation of PKB tyrosine phosphorylation by thyroid-specific oncogenic RET/PTC kinases. *Mol Endocrinol* 19:2748–2759
125. Vasko V, Saji M, Hardy E, Kruhlak M, Larin A, Savchenko V, Miyakawa M, Isozaki O, Murakami H, Tsushima T, Burman KD, De Micco C, Ringel MD 2004 Akt activation and localisation correlate with tumour invasion and oncogene expression in thyroid cancer. *J Med Genet* 41:161–170
126. Castellone MD, Celetti A, Guarino V, Cirafici AM, Basolo F, Giannini R, Medico E, Kruhföffer M, Orntoft TF, Curcio F, Fusco A, Melillo RM, Santoro M 2004 Autocrine stimulation by osteopontin plays a pivotal role in the expression of the mitogenic and invasive phenotype of RET/PTC-transformed thyroid cells. *Oncogene* 23:2188–2196
127. Guarino V, Faviana P, Salvatore G, Castellone MD, Cirafici AM, De Falco V, Celetti A, Giannini R, Basolo F, Melillo RM, Santoro M 2005 Osteopontin is overexpressed in human papillary thyroid carcinomas and enhances thyroid carcinoma cell invasiveness. *J Clin Endocrinol Metab* 90:5270–5278
128. Miyagi E, Braga-Basaria M, Hardy E, Vasko V, Burman KD, Jhiang S, Saji M, Ringel MD 2004 Chronic expression of RET/PTC 3 enhances basal and insulin-stimulated PI3 kinase/AKT signaling and increases IRS-2 expression in FRTL-5 thyroid cells. *Mol Carcinog* 41:98–107
129. Rhoden KJ, Johnson C, Brandao G, Howe JG, Smith BR, Tallini G 2004 Real-time quantitative RT-PCR identifies distinct c-RET, RET/PTC1 and RET/PTC3 expression patterns in papillary thyroid carcinoma. *Lab Invest* 84:1557–1570
130. Heinlein CA, Ting HJ, Yeh S, Chang C 1999 Identification of ARA70 as a ligand-enhanced coactivator for the peroxisome proliferator-activated receptor  $\gamma$ . *J Biol Chem* 274:16147–16152
131. Abbosh PH, Nephew KP 2005 Multiple signaling pathways converge on  $\beta$ -catenin in thyroid cancer. *Thyroid* 15:551–561
132. Phay JE, Moley JF, Lairmore TC 2000 Multiple endocrine neoplasias. *Semin Surg Oncol* 18:324–332
133. Mathew CGP, Chin KS, Easton DF, Thorpe K, Carter C, Liou GI, Fong S-L, Bridges CDB, Haak H, Nieuwenhuijzen-Kruseman AC, Schifter S, Hansen HH, Telenius H, Telenius-Berg M, Ponder BAJ 1987 A linked genetic marker for multiple endocrine neoplasia type 2A on chromosome 10. *Nature* 328:527–528
134. Mulligan LM, Kwok JBJ, Healey CS, Elsdon MJ, Eng C, Gardner E, Love DR, Mole SE, Moore JK, Papi L, Ponder MA, Telenius H, Tunnacliffe A, Ponder BAJ 1993 Germ-line mutations of the RET proto-oncogene in multiple endocrine neoplasia type 2A. *Nature* 363:458–460
135. Donis-Keller H, Dou S, Chi D, Carlson KM, Toshima K, Lairmore TC, Howe JR, Moley JF, Goodfellow P, Wells Jr SA 1993 Mutations in the RET proto-oncogene are associated with MEN 2A and FMTC. *Hum Mol Genet* 2:851–856
136. Hofstra RMW, Landsvater RM, Ceccherini I, Stulp RP, Stelwagen T, Yin L, Pasini B, Höppener JWM, Ploos van Amstel HK, Romeo G, Lips CJM, Buys CHCM 1994 A mutation in the RET proto-oncogene associated with multiple endocrine neoplasia type 2B and sporadic medullary thyroid carcinoma. *Nature* 367:375–376
137. Carlson KM, Dou S, Chi D, Scavarda N, Toshima K, Jackson CE, Wells Jr SA, Goodfellow PJ, Donis-Keller H 1994 Single missense mutation in the tyrosine kinase catalytic domain of the RET proto-oncogene is associated with multiple endocrine neoplasia type 2B. *Proc Natl Acad Sci USA* 91:1579–1583
138. Eng C, Smith DP, Mulligan LM, Nagai MA, Healey CS, Ponder MA, Gardner E, Scheumann GF, Jackson CE, Tunnacliffe A, Ponder BAJ 1994 Point mutation within the tyrosine kinase domain of the RET proto-oncogene in multiple endocrine neoplasia type 2B and related sporadic tumours. *Hum Mol Genet* 3:237–241
139. Eng C, Clayton D, Schuffenecker I, Lenoir G, Cote G, Gagel RF, van Amstel HK, Lips CJ, Nishisho I, Takai SI, Marsh DJ, Robinson BG, Frank-Raue K, Raue F, Xue F, Noll WW, Romei C, Pacini F, Fink M, Niederle B, Zedenius J, Nordenskjöld M, Komminoth P, Hendy GN, Mulligan LM 1996 The relationship between specific RET proto-oncogene mutations and disease phenotype in multiple endocrine neoplasia type 2. International RET Mutation Consortium analysis. *JAMA* 276:1575–1579
140. Brandi ML, Gagel RF, Angeli A, Bilezikian JP, Beck-Peccoz P, Bordini C, Conte-Devolx B, Falchetti A, Gheri RG, Libroia A, Lips CJ, Lombardi G, Mannelli M, Pacini F, Ponder BA, Raue F, Skogseid B, Tamburrano G, Thakker RV, Thompson NW, Tomassetti P, Tonelli F, Wells Jr SA, Marx SJ 2001 Guidelines for diagnosis and therapy of MEN type 1 and type 2. *J Clin Endocrinol Metab* 86:5658–5671
141. Machens A, Dralle H 2006 Multiple endocrine neoplasia type 2 and the RET proto-oncogene: from bedside to bench to bedside. *Mol Cell Endocrinol* 247:34–40
142. Ito S, Iwashita T, Asai N, Murakami H, Iwata Y, Sobue G, Takahashi M 1997 Biological properties of Ret with cysteine mutations correlate with multiple endocrine neoplasia type 2A, familial medullary thyroid carcinoma, and Hirschsprung's disease phenotype. *Cancer Res* 57:2870–2872
143. Machens A, Niccoli-Sire P, Hoegel J, Frank-Raue K, van Vroonhoven TJ, Roehrer HD, Wahl RA, Lamesch P, Raue F, Conte-Devolx B, Dralle H; European Multiple Endocrine Neoplasia (EUROMEN) Study Group 2003 Early malignant progression of hereditary medullary thyroid cancer. *N Engl J Med* 349:1517–1525
144. Miyauchi A, Futami H, Hai N, Yokozawa T, Kuma K, Aoki N, Kosugi S, Sugano K, Yamaguchi K 1999 Two germline missense mutations at codons 804 and 806 of the RET proto-oncogene in the same allele in a patient with multiple endocrine neoplasia type 2B without codon 918 mutation. *Jpn J Cancer Res* 90:1–5
145. Menko FH, van der Luijt RB, de Valk IA, Toorians AW, Sepers JM, van Diest PJ, Lips CJ 2002 Atypical MEN type 2B associated with two germline RET mutations on the same allele not involving codon 918. *J Clin Endocrinol Metab* 87:393–397
146. Eng C, Mulligan LM 1997 Mutations of the RET proto-oncogene in the multiple endocrine neoplasia type 2 syndromes, related sporadic tumours, and Hirschsprung disease. *Hum Mutat* 9:97–109
147. Dvorakova S, Vacklavikova E, Duskova J, Vlcek P, Ryska A, Bendlova B 2005 Exon 5 of the RET proto-oncogene: a newly detected

- risk exon for familial medullary thyroid carcinoma, a novel germline mutation Gly321Arg. *J Endocrinol Invest* 28:905–909
148. Da Silva AM, Maciel RM, Da Silva MR, Toledo SR, De Carvalho MB, Cerutti JM 2003 A novel germ-line point mutation in RET exon 8 (Gly(533)Cys) in a large kindred with familial medullary thyroid carcinoma. *J Clin Endocrinol Metab* 88:5438–5443
  149. Saez ME, Ruiz A, Cebrian A, Morales F, Robledo M, Antinolo G, Borrego S 2000 A new germline mutation, R600Q, within the coding region of RET proto-oncogene: a rare polymorphism or a MEN 2 causing mutation? *Hum Mutat* 15:122
  150. Rey JM, Brouillet JP, Fonteneau-Allaire J, Boneu A, Bastie D, Maudelonde T, Pujol P 2001 Novel germline RET mutation segregating with papillary thyroid carcinomas. *Genes Chromosomes Cancer* 32:390–391
  151. Wiench M, Wygoda Z, Gubala E, Wloch J, Lisowska K, Krasowski J, Scieglinska D, Fiszer-Kierzkowska A, Lange D, Kula D, Zeman M, Roskosz J, Kukulska A, Krawczyk Z, Jarzab B 2001 Estimation of risk of inherited medullary thyroid carcinoma in apparent sporadic patients. *J Clin Oncol* 19:1374–1380
  152. Ahmed SA, Snow-Bailey K, Highsmith WE, Sun W, Fenwick RG, Mao R 2005 Nine novel germline gene variants in the RET proto-oncogene identified in twelve unrelated cases. *J Mol Diagn* 7:283–288
  153. Aiello A, Cioni K, Gobbo M, Collini P, Gullo M, Della Torre G, Passerini E, Ferrando B, Pilotti S, Pierotti MA, Pasini B 2005 The familial medullary thyroid carcinoma-associated RET E768D mutation in a multiple endocrine neoplasia type 2A case. *Surgery* 137:574–576
  154. D'Aloiso L, Carlomagno F, Bisceglia M, Anaganti S, Ferretti E, Verrienti A, Arturi F, Scarpelli D, Russo D, Santoro M, Filetti S 2006 Clinical case seminar: *in vivo* and *in vitro* characterization of a novel germline RET mutation associated with low-penetrant non-aggressive familial medullary thyroid carcinoma. *J Clin Endocrinol Metab* 91:754–759
  155. Miyauchi A, Matsuzuka F, Hirai K, Yokozawa T, Kobayashi K, Ito Y, Nakano K, Kuma K, Futami H, Yamaguchi K 2002 Prospective trial of unilateral surgery for nonhereditary medullary thyroid carcinoma in patients without germline RET mutations. *World J Surg* 26:1023–1028
  156. Maschek W, Pichler R, Rieger R, Weinhausel A, Berg J 2002 A new identified germline mutation of the RET proto-oncogene responsible for familial medullary thyroid carcinoma in co-existence with a hyperfunctioning autonomous nodule. *Clin Endocrinol (Oxf)* 56: 823
  157. Berndt I, Reuter M, Saller B, Frank-Raue K, Groth P, Grussendorf M, Raue F, Ritter MM, Hoppner W 1998 A new hot spot for mutations in the ret protooncogene causing familial medullary thyroid carcinoma and multiple endocrine neoplasia type 2A. *J Clin Endocrinol Metab* 83:770–774
  158. Bolino A, Schuffenecker I, Luo Y, Seri M, Silengo M, Tocco T, Chabrier G, Houdent C, Murat A, Schlumberger M, Tournaire J, Lenoir GM, Romeo G 1995 RET mutations in exons 13 and 14 of FMTC patients. *Oncogene* 10:2415–2419
  159. Nilsson O, Tisell LE, Jansson S, Ahlman H, Gimm O, Eng C 1999 Adrenal and extra-adrenal pheochromocytomas in a family with germline RET V804L mutation. *JAMA* 281:1587–1588
  160. Demeester R, Parma J, Cochaux P, Vassart G, Abramowicz MJ 2001 A rare variant, I852M, of the RET proto-oncogene in a patient with medullary thyroid carcinoma at age 20 years. *Hum Mutat* 17:354
  161. Hofstra RM, Fattoruso O, Quadro L, Wu Y, Libroia A, Verga U, Colantuoni V, Buys CH 1997 A novel point mutation in the intracellular domain of the RET protooncogene in a family with medullary thyroid carcinoma. *J Clin Endocrinol Metab* 82:4176–4178
  162. Jimenez C, Habra MA, Huang SC, El Naggar A, Shapiro SE, Evans DB, Cote G, Gagel RF 2004 Pheochromocytoma and medullary thyroid carcinoma: a new genotype-phenotype correlation of the RET protooncogene 891 germline mutation. *J Clin Endocrinol Metab* 89:4142–4145
  163. Jimenez C, Dang GT, Schultz PN, El Naggar A, Shapiro S, Barnes EA, Evans DB, Vassilopoulou-Sellin R, Gagel RF, Cote GJ, Hoff AO 2004 A novel point mutation of the RET protooncogene involving the second intracellular tyrosine kinase domain in a family with medullary thyroid carcinoma. *J Clin Endocrinol Metab* 89: 3521–3526
  164. Poturnajova M, Altanerova V, Kostalova L, Breza J, Altaner C 2005 Novel germline mutation in the transmembrane region of RET gene close to Cys634Ser mutation associated with MEN 2A syndrome. *J Mol Med* 83:287–295
  165. Nunes AB, Ezabella MC, Pereira AC, Krieger JE, Toledo SP 2002 A novel Val648Ile substitution in RET protooncogene observed in a Cys634Arg multiple endocrine neoplasia type 2A kindred presenting with an adrenocorticotropin-producing pheochromocytoma. *J Clin Endocrinol Metab* 87:5658–5661
  166. Tessitore A, Sinisi AA, Pasquali D, Cardone M, Vitale D, Bellastella A, Colantuoni V 1999 A novel case of multiple endocrine neoplasia type 2A associated with two de novo mutations of the RET protooncogene. *J Clin Endocrinol Metab* 84:3522–3527
  167. Bartsch DK, Hasse C, Schug C, Barth P, Rothmund M, Hoppner W 2000 A RET double mutation in the germline of a kindred with FMTC. *Exp Clin Endocrinol Diabetes* 108:128–132
  168. Pigny P, Bauters C, Wemeau JL, Houcke ML, Crepin M, Caron P, Giraud S, Calender A, Buisine MP, Kerckaert JP, Porchet N 1999 A novel 9-base pair duplication in RET exon 8 in familial medullary thyroid carcinoma. *J Clin Endocrinol Metab* 84:1700–1704
  169. Hoppner W, Ritter MM 1997 A duplication of 12 bp in the critical cysteine rich domain of the RET proto-oncogene results in a distinct phenotype of multiple endocrine neoplasia type 2A. *Hum Mol Genet* 6:587–590
  170. Hoppner W, Dralle H, Brabant G 1998 Duplication of 9 base pairs in the critical cysteine-rich domain of the RET proto-oncogene causes multiple endocrine neoplasia type 2A. *Hum Mutat Suppl* 1:S128–S130
  171. Donis-Keller H 1995 The RET proto-oncogene and cancer. *J Intern Med* 238:319–325
  172. Lips C, Landsvater RM, Hoppener J, Geerdink RA, Blijham G, Jansen-Schillhorn van Veen JM, van Gils J, de Wit MJ, Zewald RA, Berends M, Beemer FA, Brouwers-Smalbraak J, Jansen R, Ploos van Amstel HK, van Vroonhoven T, Vroom TM 1994 Clinical screening as compared with DNA analysis in families with multiple endocrine neoplasia type 2A. *N Engl J Med* 331:828–835
  173. Gimm O, Marsh DJ, Andrew SD, Frilling A, Dahia PL, Mulligan LM, Zajac JD, Robinson BG, Eng C 1997 Germline dinucleotide mutation in codon 883 of the RET proto-oncogene in multiple endocrine neoplasia type 2B without codon 918 mutation. *J Clin Endocrinol Metab* 82:3902–3904
  174. Vandenbosch K, Renard M, Uyttebroeck A, Sciort R, Matthijs G, Legius E 2005 Medullary thyroid carcinoma in a child with a new RET mutation and a RET polymorphism. *Genet Couns* 16:95–100
  175. Kasprzak L, Nolet S, Gaboury L, Pavia C, Villabona C, Rivera-Fillat F, Oriola J, Foulkes WD 2001 Familial medullary thyroid carcinoma and prominent corneal nerves associated with the germline V804M and V778I mutations on the same allele of RET. *J Med Genet* 38:784–787
  176. Elisei R, Cosci B, Romei C, Agate L, Piampiani P, Miccoli P, Berti P, Basolo F, Ugolini C, Ciampi R, Nikiforov Y, Pinchera A 2004 Identification of a novel point mutation in the RET gene (Ala883Thr), which is associated with medullary thyroid carcinoma phenotype only in homozygous condition. *J Clin Endocrinol Metab* 89:5823–5827
  177. Lesueur F, Cebrian A, Cranston A, Leyland J, Faid TM, Clements MR, Robledo M, Whittaker J, Ponder BA 2005 Germline homozygous mutations at codon 804 in the RET protooncogene in medullary thyroid carcinoma/multiple endocrine neoplasia type 2A patients. *J Clin Endocrinol Metab* 90:3454–3457
  178. Lecube A, Hernandez C, Oriola J, Galard R, Gemar E, Mesa J, Simo R 2002 V804M RET mutation and familial medullary thyroid carcinoma: report of a large family with expression of the disease only in the homozygous gene carriers. *Surgery* 131:509–514
  179. Feldman GL, Edmonds MW, Ainsworth PJ, Schuffenecker I, Lenoir GM, Saxe AW, Talpos GB, Roberson J, Petrucelli N, Jackson CE 2000 Variable expressivity of familial medullary thyroid carcinoma (FMTC) due to a RET V804M (GTG→ATG) mutation. *Surgery* 128:93–98
  180. Learoyd DL, Gosnell J, Elston MS, Saurine TJ, Richardson AL,



- Delbridge LW, Aglen JV, Robinson BG 2005 Experience of prophylactic thyroidectomy in multiple endocrine neoplasia type 2A kindreds with RET codon 804 mutations. *Clin Endocrinol (Oxf)* 63:636–641
181. Diaz-Cano SJ, de Miguel M, Blanes A, Tashjian R, Wolfe HJ 2001 Germline RET 634 mutation positive MEN 2A-related C cell hyperplasias have genetic features consistent with intraepithelial neoplasia. *J Clin Endocrinol Metab* 86:3948–3957
182. Brooks AS, Oostra BA, Hofstra RM 2005 Studying the genetics of Hirschsprung's disease: unraveling an oligogenic disorder. *Clin Genet* 67:6–14
183. Brooks AS, Bertoli-Avella AM, Burzynski GM, Breedveld GJ, Osinga J, Boven LG, Hurst JA, Mancini GM, Lequin MH, de Coe RF, Matera I, de Graaff E, Meijers C, Willems PJ, Tibboel D, Oostra BA, Hofstra RM 2005 Homozygous nonsense mutations in KIAA1279 are associated with malformations of the central and enteric nervous systems. *Am J Hum Genet* 77:120–126
184. Amiel J, Lyonnet S 2001 Hirschsprung disease, associated syndromes, and genetics: a review. *J Med Genet* 38:729–739
185. Hansford JR, Mulligan LM 2000 Multiple endocrine neoplasia type 2 and RET: from neoplasia to neurogenesis. *J Med Genet* 37:817–827
186. Zedenius J, Wallin G, Hamberger B, Nordenskjold M, Weber G, Larsson C 1994 Somatic and MEN 2A de novo mutations identified in the RET proto-oncogene by screening of sporadic MTCs. *Hum Mol Genet* 3:1259–1262
187. Eng C, Mulligan LM, Healey CS, Houghton C, Frilling A, Raue F, Thomas GA, Ponder BA 1996 Heterogeneous mutation of the RET proto-oncogene in subpopulations of medullary thyroid carcinoma. *Cancer Res* 56:2167–2170
188. Marsh DJ, Learoyd DL, Andrew SD, Krishnan L, Pojer R, Richardson AL, Delbridge L, Eng C, Robinson BG 1996 Somatic mutations in the RET proto-oncogene in sporadic medullary thyroid carcinoma. *Clin Endocrinol (Oxf)* 44:249–257
189. Romei C, Elisei R, Pinchera A, Ceccherini I, Molinaro E, Mancusi F, Martino E, Romeo G, Pacini F 1996 Somatic mutations of the RET proto-oncogene in sporadic medullary thyroid carcinoma are not restricted to exon 16 and are associated with tumor recurrence. *J Clin Endocrinol Metab* 81:1619–1622
190. Bugalho MJ, Frade JP, Santos JR, Limbert E, Sobrinho L 1997 Molecular analysis of the RET proto-oncogene in patients with sporadic medullary thyroid carcinoma: a novel point mutation in the extracellular cysteine-rich domain. *Eur J Endocrinol* 136:423–426
191. Alemi M, Lucas SD, Sallstrom JF, Bergholm U, Akerstrom G, Wilander E 1997 A complex nine base pair deletion in RET exon 11 common in sporadic medullary thyroid carcinoma. *Oncogene* 14:2041–2045
192. Shirahama S, Ogura K, Takami H, Ito K, Tohsen T, Miyauchi A, Nakamura Y 1998 Mutational analysis of the RET proto-oncogene in 71 Japanese patients with medullary thyroid carcinoma. *J Hum Genet* 43:101–106
193. Uchino S, Noguchi S, Yamashita H, Sato M, Adachi M, Yamashita H, Watanabe S, Ohshima A, Mitsuyama S, Iwashita T, Takahashi M 1999 Somatic mutations in RET exons 12 and 15 in sporadic medullary thyroid carcinomas: different spectrum of mutations in sporadic type from hereditary type. *Jpn J Cancer Res* 90:1231–1237
194. Kalinin VN, Amosenko FA, Shabanov MA, Lubchenko LN, Hosch SB, Garkavtseva RF, Izbicki JR 2001 Three novel mutations in the RET proto-oncogene. *J Mol Med* 79:609–612
195. Jindrichova S, Kodet R, Krskova L, Vlcek P, Bendlova B 2003 The newly detected mutations in the RET proto-oncogene in exon 16 as a cause of sporadic medullary thyroid carcinoma. *J Mol Med* 81: 819–823
196. Ceccherini I, Pasini B, Pacini F, Gullo M, Bongarzone I, Romei C, Santamaria G, Matera I, Mondellini P, Scopsi L, Pinchera A, Pierotti MA, Romeo G 1997 Somatic in frame deletions not involving juxtamembranous cysteine residues strongly activate the RET proto-oncogene. *Oncogene* 14:2609–2612
197. Schilling T, Burck J, Sinn HP, Clemens A, Otto HF, Hoppner W, Herfarth C, Ziegler R, Schwab M, Raue F 2001 Prognostic value of codon 918 (ATG→ACG) RET proto-oncogene mutations in sporadic medullary thyroid carcinoma. *Int J Cancer* 95:62–66
198. Neumann HP, Bausch B, McWhinney SR, Bender BU, Gimm O, Franke G, Schipper J, Klisch J, Althoefer C, Zerres K, Januszewicz A, Eng C, Smith WM, Munk R, Manz T, Glaesker S, Apel TW, Treier M, Reineke M, Walz MK, Hoang-Vu C, Brauckhoff M, Klein-Franke A, Klose P, Schmidt H, Maier-Woelfle M, Peczkowska M, Szmigielski C, Eng C 2002 Germ-line mutations in nonsyndromic pheochromocytoma. *N Engl J Med* 346:1459–1466
199. Bryant J, Farmer J, Kessler LJ, Townsend RR, Nathanson KL 2003 Pheochromocytoma: the expanding genetic differential diagnosis. *J Natl Cancer Inst* 95:1196–1204
200. Beldjord C, Desclaux-Armand F, Raffin-Sanson M, Corvol JC, De Keyser Y, Luton JP, Plouin PF, Bertagna X 1995 The RET protooncogene in sporadic pheochromocytomas: frequent MEN 2-like mutations and new molecular defects. *J Clin Endocrinol Metab* 80:2063–2068
201. Lindor NM, Honchel R, Khosla S, Thibodeau SN 1995 Mutations in the RET protooncogene in sporadic pheochromocytomas. *J Clin Endocrinol Metab* 80:627–629
202. Yoshimoto K, Tanaka C, Hamaguchi S, Kimura T, Iwahana H, Miyachi A, Itakura M 1995 Tumor-specific mutations in the tyrosine kinase domain of the RET proto-oncogene in pheochromocytomas of sporadic type. *Endocr J* 42:265–270
203. van der Harst E, de Krijger RR, Bruining HA, Lamberts SW, Bonjer HJ, Dinjens WN, Proye C, Koper JW, Bosman FT, Roth J, Heitz PU, Komminoth P 1998 Prognostic value of RET proto-oncogene point mutations in malignant and benign, sporadic pheochromocytomas. *Int J Cancer* 79:537–540
204. Borrello MG, Smith DP, Pasini B, Bongarzone I, Greco A, Lorenzo MJ, Arighi E, Miranda C, Eng C, Alberti L, Bocciardi R, Mondellini P, Scopsi L, Romeo G, Ponder BAJ, Pierotti MA 1995 RET activation by germline MEN2A and MEN2B mutations. *Oncogene* 11:2419–2427
205. Santoro M, Carlomagno F, Romano A, Bottaro DP, Dathan NA, Grieco M, Fusco A, Vecchio G, Matoskova B, Kraus MH, Di Fiore PP 1995 Activation of RET as a dominant transforming gene by germline mutations of MEN2A and MEN2B. *Science* 267:381–383
206. Carlomagno F, Melillo RM, Visconti R, Salvatore G, De Vita G, Lupoli G, Yu Y, Jing S, Vecchio G, Fusco A, Santoro M 1998 Glial cell line-derived neurotrophic factor differentially stimulates RET mutants associated with the multiple endocrine neoplasia type 2 syndromes and Hirschsprung's disease. *Endocrinology* 139:3613–3619
207. Arighi E, Popsueva A, Degl'Innocenti D, Borrello MG, Carniti C, Peralà NM, Pierotti MA, Sariola H 2004 Biological effects of the dual phenotypic Janus mutation of RET cosegregating with both multiple endocrine neoplasia type 2 and Hirschsprung's disease. *Mol Endocrinol* 18:1004–1017
208. Chiariello M, Visconti R, Carlomagno F, Melillo RM, Bucci C, de Francis V, Fox GM, Jing S, Coso OA, Gutkind JS, Fusco A, Santoro M 1998 Signalling of the Ret receptor tyrosine kinase through the c-Jun NH2-terminal protein kinases (JNKs): evidence for a divergence of the ERKs and JNKs pathways induced by Ret. *Oncogene* 16:2435–2445
209. Marshall GM, Peaston AE, Hocker JE, Smith SA, Hansford LM, Tobias V, Norris MD, Haber M, Smith DP, Lorenzo MJ, Ponder BA, Hancock JF 1997 Expression of multiple endocrine neoplasia 2B RET in neuroblastoma cells alters cell adhesion in vitro, enhances metastatic behavior in vivo, and activates Jun kinase. *Cancer Res* 57:5399–5405
210. Freche B, Guillaumot P, Charmetant J, Pelletier L, Luquain C, Christiansen D, Billaud M, Manie SN 2005 Inducible dimerization of RET reveals a specific AKT deregulation in oncogenic signaling. *J Biol Chem* 280:36584–36591
211. Salvatore D, Melillo RM, Monaco C, Visconti R, Fenzi G, Vecchio G, Fusco A, Santoro M 2001 Increased in vivo phosphorylation of ret tyrosine 1062 is a potential pathogenetic mechanism of multiple endocrine neoplasia type 2B. *Cancer Res* 61:1426–1431
212. Chappuis-Flament S, Pasini A, De Vita G, Segouffin-Cariou C, Fusco A, Attie T, Lenoir GM, Santoro M, Billaud M 1998 Dual effect on the RET receptor of MEN 2 mutations affecting specific extracytoplasmic cysteines. *Oncogene* 17:2851–2861
213. Mograbi B, Bocciardi R, Bourget I, Juhel T, Farahi-Far D, Romeo G, Ceccherini I, Rossi B 2001 The sensitivity of activated Cys Ret



- mutants to glial cell line-derived neurotrophic factor is mandatory to rescue neuroectodermic cells from apoptosis. *Mol Cell Biol* 21: 6719–6730
214. Jhiang SM 2000 The RET proto-oncogene in human cancers. *Oncogene* 19:5590–5597
  215. Lesueur F, Corbex M, McKay JD, Lima J, Soares P, Griseri P, Burgess J, Ceccherini I, Landolfi S, Papotti M, Amorim A, Goldgar DE, Romeo G 2002 Specific haplotypes of the RET proto-oncogene are over-represented in patients with sporadic papillary thyroid carcinoma. *J Med Genet* 39:260–265
  216. Stephens LA, Powell NG, Grubb J, Jeremiah SJ, Bethel JA, Demidchik EP, Bogdanova TI, Tronko MD, Thomas GA 2005 Investigation of loss of heterozygosity and SNP frequencies in the RET gene in papillary thyroid carcinoma. *Thyroid* 15:100–104
  217. Ho T, Li G, Zhao C, Wei Q, Sturgis EM 2005 RET polymorphisms and haplotypes and risk of differentiated thyroid cancer. *Laryngoscope* 115:1035–1041
  218. Ceccherini I, Hofstra RMW, Yin L, Stulp RP, Barone V, Stelwagen T, Boccardi R, Nijveen H, Bolino A, Seri M, Ronchetto P, Pasini B, Bozzano M, Buys CHCM, Romeo G 1994 DNA polymorphisms and conditions for SSCP analysis of the 20 exons of the RET proto-oncogene. *Oncogene* 9:3025–3029
  219. Robledo M, Gil L, Pollan M, Cebrian A, Ruiz S, Azanedo M, Benitez J, Menarguez J, Rojas JM 2003 Polymorphisms G691S/S904S of RET as genetic modifiers of MEN 2A. *Cancer Res* 63: 1814–1817
  220. Baumgartner-Parzer SM, Lang R, Wagner L, Heinze G, Niederle B, Kaserer K, Waldhausl W, Vierhapper H 2005 Polymorphisms in exon 13 and intron 14 of the RET proto-oncogene: genetic modifiers of medullary thyroid carcinoma? *J Clin Endocrinol Metab* 90:6232–6236
  221. Gimm O, Neuberg DS, Marsh DJ, Dahia PL, Hoang-Vu C, Raue F, Hinze R, Dralle H, Eng C 1999 Over-representation of a germline RET sequence variant in patients with sporadic medullary thyroid carcinoma and somatic RET codon 918 mutation. *Oncogene* 18: 1369–1373
  222. Ruiz A, Antinolo G, Fernandez RM, Eng C, Marcos I, Borrego S 2001 Germline sequence variant S836S in the RET proto-oncogene is associated with low level predisposition to sporadic medullary thyroid carcinoma in the Spanish population. *Clin Endocrinol (Oxf)* 55:399–402
  223. Berard I, Kraimps JL, Savagner F, Murat A, Renaudin K, Nicolli-Sire P, Bertrand G, Moisan JP, Bezieau S 2004 Germline-sequence variants S836S and L769L in the RE arranged during Transfection (RET) proto-oncogene are not associated with predisposition to sporadic medullary carcinoma in the French population. *Clin Genet* 65:150–152
  224. Wiench M, Wloch J, Wygoda Z, Gubala E, Oczko M, Pawlaczek A, Kula D, Lange D, Jarzab B 2004 RET polymorphisms in codons 769 and 836 are not associated with predisposition to medullary thyroid carcinoma. *Cancer Detect Prev* 28:231–236
  225. Cebrian A, Lesueur F, Martin S, Leyland J, Ahmed S, Luccarini C, Smith PL, Luben R, Whittaker J, Pharoah PD, Dunning AM, Ponder BA 2005 Polymorphisms in the initiators of RET (rearranged during transfection) signaling pathway and susceptibility to sporadic medullary thyroid carcinoma. *J Clin Endocrinol Metab* 90:6268–6274
  226. Wohllk GN, Soto CE, Bravo AM, Becker CP 2005 G691S, L769L and S836S RET proto-oncogene polymorphisms are not associated with higher risk to sporadic medullary thyroid carcinoma in Chilean patients. *Rev Med Chil* 133:397–402
  227. Borrego S, Wright FA, Fernandez RM, Williams N, Lopez-Alonso M, Davuluri R, Antinolo G, Eng C 2003 A founding locus within the RET proto-oncogene may account for a large proportion of apparently sporadic Hirschsprung disease and a subset of cases of sporadic medullary thyroid carcinoma. *Am J Hum Genet* 72:88–100
  228. Gath R, Goessling A, Keller KM, Koletzko S, Coerd T, Muntefering H, Wirth S, Hofstra RM, Mulligan L, Eng C, von Deimling A 2001 Analysis of the RET, GDNF, EDN3, and EDNRB genes in patients with intestinal neuronal dysplasia and Hirschsprung disease. *Gut* 48:671–675
  229. Fitze G, Schierz M, Kuhlisch E, Schreiber M, Ziegler A, Roesner D, Schackert HK 2003 Novel intronic polymorphisms in the RET proto-oncogene and their association with Hirschsprung disease. *Hum Mutat* 22:177
  230. Borrego S, Saez ME, Ruiz A, Gimm O, Lopez-Alonso M, Antinolo G, Eng C 1999 Specific polymorphisms in the RET proto-oncogene are over-represented in patients with Hirschsprung disease and may represent loci modifying phenotypic expression. *J Med Genet* 36:771–774
  231. Gimm O, Dziema H, Brown J, Hoang-Vu C, Hinze R, Dralle H, Mulligan LM, Eng C 2001 Over-representation of a germline variant in the gene encoding RET co-receptor GFR $\alpha$ -1 but not GFR $\alpha$ -2 or GFR $\alpha$ -3 in cases with sporadic medullary thyroid carcinoma. *Oncogene* 20:2161–2170
  232. Borrego S, Fernandez RM, Dziema H, Japon MA, Marcos I, Eng C, Antinolo G 2002 Evaluation of germline sequence variants of GFR $\alpha$ 1, GFR $\alpha$ 2, and GFR $\alpha$ 3 genes in a cohort of Spanish patients with sporadic medullary thyroid cancer. *Thyroid* 12:1017–1022
  233. McWhinney SR, Boru G, Binkley PK, Peczkowska M, Januszewicz AA, Neumann HP, Eng C 2003 Intronic single nucleotide polymorphisms in the RET protooncogene are associated with a subset of apparently sporadic pheochromocytoma and may modulate age of onset. *J Clin Endocrinol Metab* 88:4911–4916
  234. Kahraman T, de Groot JW, Rouwe C, Hofstra RM, Links TP, Sijmons RH, Plukker JT 2003 Acceptable age for prophylactic surgery in children with multiple endocrine neoplasia type 2a. *Eur J Surg Oncol* 29:331–335
  235. Machens A, Ukkat J, Brauckhoff M, Gimm O, Dralle H 2005 Advances in the management of hereditary medullary thyroid cancer. *J Intern Med* 257:50–59
  236. Skinner MA, Moley JA, Dilley WG, Owzar K, Debenedetti MK, Wells Jr SA 2005 Prophylactic thyroidectomy in multiple endocrine neoplasia type 2A. *N Engl J Med* 353:1105–1113
  237. Machens A, Brauckhoff M, Holzhausen HJ, Thanh PN, Lehnert H, Dralle H 2005 Codon-specific development of pheochromocytoma in multiple endocrine neoplasia type 2. *J Clin Endocrinol Metab* 90:3999–4003
  238. Gimm O, Ukkat J, Niederle BE, Weber T, Thanh PN, Brauckhoff M, Niederle B, Dralle H 2004 Timing and extent of surgery in patients with familial medullary thyroid carcinoma/multiple endocrine neoplasia 2A-related RET mutations not affecting codon 634. *World J Surg* 28:1312–1316
  239. Niccoli-Sire P, Murat A, Rohmer V, Gibelin H, Chabrier G, Conte-Devolx B, Visset J, Ronceray J, Jaek D, Henry JF, Proye C, Carnaille B, Kraimps JL 2003 When should thyroidectomy be performed in familial medullary thyroid carcinoma gene carriers with non-cysteine RET mutations? *Surgery* 134:1029–1036
  240. Brauckhoff M, Gimm O, Weiss CL, Ukkat J, Sekulla C, Brauckhoff K, Thanh PN, Dralle H 2004 Multiple endocrine neoplasia 2B syndrome due to codon 918 mutation: clinical manifestation and course in early and late onset disease. *World J Surg* 28:1305–1311
  241. Decker RA, Geiger JD, Cox CE, Mackovjak M, Sarkar M, Peacock ML 1996 Prophylactic surgery for multiple endocrine neoplasia type IIa after genetic diagnosis: is parathyroid transplantation indicated? *World J Surg* 20:814–820
  242. Dralle H, Gimm O, Simon D, Frank-Raue K, Gortz G, Niederle B, Wahl RA, Koch B, Walgenbach S, Hampel R, Ritter MM, Spelsberg F, Heiss A, Hinze R, Hoppner W 1998 Prophylactic thyroidectomy in 75 children and adolescents with hereditary medullary thyroid carcinoma: German and Austrian experience. *World J Surg* 22:744–750
  243. Wells Jr SA, Skinner MA 1998 Prophylactic thyroidectomy, based on direct genetic testing, in patients at risk for the multiple endocrine neoplasia type 2 syndromes. *Exp Clin Endocrinol Diabetes* 106:29–34
  244. Lallier M, St Vil D, Giroux M, Huot C, Gaboury L, Oligny L, Desjardins JG 1998 Prophylactic thyroidectomy for medullary thyroid carcinoma in gene carriers of MEN2 syndrome. *J Pediatr Surg* 33:846–848
  245. Iler MA, King DR, Ginn-Pease ME, O'Dorisio TM, Sotos JF 1999 Multiple endocrine neoplasia type 2A: a 25-year review. *J Pediatr Surg* 34:92–96
  246. Niccoli-Sire P, Murat A, Baudin E, Henry JF, Proye C, Bigorgne JC, Bstandig B, Modigliani E, Morange S, Schlumberger M, Conte-Devolx B 1999 Early or prophylactic thyroidectomy in MEN

- 2/FMTC gene carriers: results in 71 thyroidectomized patients. The French Calcitonin Tumours Study Group (GETC). *Eur J Endocrinol* 141:468–474
247. Sanso GE, Domene HM, Garcia R, Pusiol E, de M, Roque M, Ring A, Perinetti H, Elsner B, Iorcansky S, Barontini M 2002 Very early detection of RET proto-oncogene mutation is crucial for preventive thyroidectomy in multiple endocrine neoplasia type 2 children: presence of C cell malignant disease in asymptomatic carriers. *Cancer* 94:323–330
  248. Rodriguez GJ, Balsalobre MD, Pomares F, Torregrosa NM, Rios A, Carbonell P, Glower G, Sola J, Tebar J, Parrilla P 2002 Prophylactic thyroidectomy in MEN 2A syndrome: experience in a single center. *J Am Coll Surg* 195:159–166
  249. Gill JR, Reyes-Mugica M, Iyengar S, Kidd KK, Touloukian RJ, Smith C, Keller MS, Genel M 1996 Early presentation of metastatic medullary carcinoma in multiple endocrine neoplasia, type IIA: implications for therapy. *J Pediatr* 129:459–464
  250. Jackson MB, Guttenberg M, Hedrick H, Moshang T 2005 Multiple endocrine neoplasia type 2A in a kindred with C634Y mutation. *Pediatrics* 116:468–471
  251. Frohnauer MK, Decker RA 2000 Update on the MEN 2A c804 RET mutation: is prophylactic thyroidectomy indicated? *Surgery* 128: 1052–1057
  252. Machens A, Holzhausen HJ, Thanh PN, Dralle H 2003 Malignant progression from C-cell hyperplasia to medullary thyroid carcinoma in 167 carriers of RET germline mutations. *Surgery* 134:425–431
  253. Links TP, van Tol KM, Jager PL, Plukker JT, Piers DA, Boezen HM, Dullaart RP, de Vries EG, Sluiter WJ 2005 Life expectancy in differentiated thyroid cancer: a novel approach to survival analysis. *Endocr Relat Cancer* 12:273–280
  254. Orlandi F, Caraci P, Mussa A, Saggiorato E, Pancani G, Angeli A 2001 Treatment of medullary thyroid carcinoma: an update. *Endocr Relat Cancer* 8:135–147
  255. Lam MG, Lips CJ, Jager PL, Dullaart RP, Lentjes EG, van Rijk PP, de Klerk JM 2005 Repeated 131I-MIBG therapy in 2 patients with malignant pheochromocytoma. *J Clin Endocrinol Metab* 90:5888–5895
  256. Putzer BM, Drosten M 2004 The RET proto-oncogene: a potential target for molecular cancer therapy. *Trends Mol Med* 10:351–357
  257. Blaskovich MA, Lin Q, Delarue FL, Sun J, Park HS, Coppola D, Hamilton AD, Sebt SM 2000 Design of GFB-111, a platelet-derived growth factor binding molecule with antiangiogenic and anticancer activity against human tumors in mice. *Nat Biotechnol* 18:1065–1070
  258. Sebt SM, Hamilton AD 2000 Design of growth factor antagonists with antiangiogenic and antitumor properties. *Oncogene* 19:6566–6573
  259. Cochran AG 2000 Antagonists of protein-protein interactions. *Chem Biol* 7:R85–R94
  260. Schlessinger J 2002 Ligand-induced, receptor-mediated dimerization and activation of EGF receptor. *Cell* 110:669–672
  261. Bennisroune A, Fickova M, Gardin A, Dirrig-Grosch S, Aunis D, Cremel G, Hubert P 2004 Transmembrane peptides as inhibitors of ErbB receptor signaling. *Mol Biol Cell* 15:3464–3474
  262. Ellington AD, Szostak JW 1990 In vitro selection of RNA molecules that bind specific ligands. *Nature* 346:818–822
  263. Cerchia L, Duconge F, Pestourie C, Boulay J, Aissouni Y, Gombert K, Tavitian B, de Franciscis V, Libri D 2005 Neutralizing aptamers from whole-cell SELEX inhibit the RET receptor tyrosine kinase. *PLoS Biol* 3:e123
  264. Thiel K 2004 Oligo oligarchy: the surprisingly small world of aptamers. *Nat Biotechnol* 22:649–651
  265. Druker BJ, Talpaz M, Resta DJ, Peng B, Buchdunger E, Ford JM, Lydon NB, Kantarjian H, Capdeville R, Ohno-Jones S, Sawyers CL 2001 Efficacy and safety of a specific inhibitor of the BCR-ABL tyrosine kinase in chronic myeloid leukemia. *N Engl J Med* 344: 1031–1037
  266. Asai N, Iwashita T, Matsuyama M, Takahashi M 1995 Mechanism of activation of the RET proto-oncogene by multiple endocrine neoplasia 2A mutations. *Mol Cell Biol* 15:1613–1619
  267. Demetri GD, von Mehren M, Blanke CD, Van den Abbeele AD, Eisenberg B, Roberts PJ, Heinrich MC, Tuveson DA, Singer S, Janicek M, Fletcher JA, Silverman SG, Silberman SL, Capdeville R, Kiese B, Peng B, Dimitrijevic S, Druker BJ, Corless C, Fletcher CD, Joensuu H 2002 Efficacy and safety of imatinib mesylate in advanced gastrointestinal stromal tumors. *N Engl J Med* 347:472–480
  268. Sawyers CL 2002 Imatinib GIST keeps finding new indications: successful treatment of dermatofibrosarcoma protuberans by targeted inhibition of the platelet-derived growth factor receptor. *J Clin Oncol* 20:3568–3569
  269. Cohen MS, Hussain HB, Moley JF 2002 Inhibition of medullary thyroid carcinoma cell proliferation and RET phosphorylation by tyrosine kinase inhibitors. *Surgery* 132:960–966
  270. Skinner MA, Safford SD, Freerman AJ 2003 RET tyrosine kinase and medullary thyroid cells are unaffected by clinical doses of STI571. *Anticancer Res* 23:3601–3606
  271. de Groot JW, Plaza Menacho I, Schepers H, Drenth-Diephuis LJ, Osinga J, Plukker JT, Links TP, Eggen BJ, Hofstra RM 2006 Cellular effects of imatinib on medullary thyroid cancer cells harboring multiple endocrine neoplasia type 2A and 2B associated RET mutations. *Surgery* 139:806–814
  272. Lanzi C, Cassinelli G, Pensa T, Cassinis M, Gambetta RA, Borrello MG, Menta E, Pierotti MA, Zunino F 2000 Inhibition of transforming activity of the RET/PTC1 oncoprotein by a 2-indolinone derivative. *Int J Cancer* 85:384–390
  273. Lanzi C, Cassinelli G, Cuccuru G, Zaffaroni N, Supino R, Vignati S, Zanchi C, Yamamoto M, Zunino F 2003 Inactivation of RET/PTC1 oncoprotein and inhibition of papillary thyroid carcinoma cell proliferation by indolinone RPI-1. *Cell Mol Life Sci* 60:1449–1459
  274. Cuccuru G, Lanzi C, Cassinelli G, Pratesi G, Tortoreto M, Petrangolini G, Seregni E, Martinetti A, Laccabue D, Zanchi C, Zunino F 2004 Cellular effects and antitumor activity of RET inhibitor RPI-1 on MEN2A-associated medullary thyroid carcinoma. *J Natl Cancer Inst* 96:1006–1014
  275. Sakamoto KM 2004 Su-11248 Sugen. *Curr Opin Investig Drugs* 5:1329–1339
  276. Carlomagno F, Vitagliano D, Guida T, Napolitano M, Vecchio G, Fusco A, Gazit A, Levitzki A, Santoro M 2002 The kinase inhibitor PP1 blocks tumorigenesis induced by RET oncogenes. *Cancer Res* 62:1077–1082
  277. Carlomagno F, Vitagliano D, Guida T, Basolo F, Castellone MD, Melillo RM, Fusco A, Santoro M 2003 Efficient inhibition of RET/papillary thyroid carcinoma oncogenic kinases by 4-amino-5-(4-chloro-phenyl)-7-(t-butyl)pyrazolo[3,4-d]pyrimidine (PP2). *J Clin Endocrinol Metab* 88:1897–1902
  278. Carniti C, Perego C, Mondellini P, Pierotti MA, Bongarzone I 2003 PP1 inhibitor induces degradation of RETMEN2A and RETMEN2B oncoproteins through proteosomal targeting. *Cancer Res* 63:2234–2243
  279. Carlomagno F, Guida T, Anaganti S, Vecchio G, Fusco A, Ryan AJ, Billaud M, Santoro M 2004 Disease associated mutations at valine 804 in the RET receptor tyrosine kinase confer resistance to selective kinase inhibitors. *Oncogene* 23:6056–6063
  280. Traxler P, Allegrini PR, Brandt R, Brueggen J, Cozens R, Fabbro D, Grosios K, Lane HA, McSheehy P, Mestan J, Meyer T, Tang C, Wartmann M, Wood J, Caravatti G 2004 AEE788: a dual family epidermal growth factor receptor/ErbB2 and vascular endothelial growth factor receptor tyrosine kinase inhibitor with antitumor and antiangiogenic activity. *Cancer Res* 64:4931–4941
  281. Strock CJ, Park JL, Rosen M, Dionne C, Ruggeri B, Jones-Bolin S, Denmeade SR, Ball DW, Nelkin BD 2003 CEP-701 and CEP-751 inhibit constitutively activated RET tyrosine kinase activity and block medullary thyroid carcinoma cell growth. *Cancer Res* 63: 5559–5563
  282. Carlomagno F, Vitagliano D, Guida T, Ciardiello F, Tortora G, Vecchio G, Ryan AJ, Fontanini G, Fusco A, Santoro M 2002 ZD6474, an orally available inhibitor of KDR tyrosine kinase activity, efficiently blocks oncogenic RET kinases. *Cancer Res* 62: 7284–7290
  283. Miller KD, Trigo JM, Wheeler C, Barge A, Rowbottom J, Sledge G, Baselga J 2005 A multicenter phase II trial of ZD6474, a vascular endothelial growth factor receptor-2 and epidermal growth factor

- receptor tyrosine kinase inhibitor, in patients with previously treated metastatic breast cancer. *Clin Cancer Res* 11:3369–3376
284. Wells SA, You Y, Lakhani V, Bauer M, Langmuir P, Headley D, Skinner MA, Morse M, Burch W, The use of ZACTIMA (ZD6474) in the treatment of patients with hereditary medullary thyroid carcinoma. Proc of American Association for Cancer Research-National Cancer Institute-European Organisation for Research and Treatment of Cancer International Conference on Molecular Targets and Cancer Therapeutics Philadelphia, 2005 (Abstract B248)
  285. Tibes R, Trent J, Kurzrock R 2005 Tyrosine kinase inhibitors and the dawn of molecular cancer therapeutics. *Annu Rev Pharmacol Toxicol* 45:357–384
  286. Hennige AM, Lammers R, Hoppner W, Arlt D, Strack V, Teichmann R, Machicao F, Ullrich A, Haring HU, Kellerer M 2001 Inhibition of Ret oncogene activity by the protein tyrosine phosphatase SHP1. *Endocrinology* 142:4441–4447
  287. Zatelli MC, Piccin D, Tagliati F, Bottoni A, Luchin A, degli Uberti EC 2005 SRC homology-2-containing protein tyrosine phosphatase-1 restrains cell proliferation in human medullary thyroid carcinoma. *Endocrinology* 146:2692–2698
  288. Dancey J, Sausville EA 2003 Issues and progress with protein kinase inhibitors for cancer treatment. *Nat Rev Drug Discov* 2:296–313
  289. Melisi D, Troiani T, Damiano V, Tortora G, Ciardiello F 2004 Therapeutic integration of signal transduction targeting agents and conventional anti-cancer treatments. *Endocr Relat Cancer* 11:51–68
  290. Carlomagno F, Anaganti S, Guida T, Salvatore G, Troncone G, Wilhelm SM, Santoro M 2006 BAY 43–9006 inhibition of oncogenic RET mutants. *J Natl Cancer Inst* 98:326–334
  291. Tamm I, Dorken B, Hartmann G 2001 Antisense therapy in oncology: new hope for an old idea? *Lancet* 358:489–497
  292. Winter-Vann AM, Casey PJ 2005 Post-prenylation-processing enzymes as new targets in oncogenesis. *Nat Rev Cancer* 5:405–412
  293. Vivanco I, Sawyers CL 2002 The phosphatidylinositol 3-kinase AKT pathway in human cancer. *Nat Rev Cancer* 2:489–501
  294. Schmelzle T, Hall MN 2000 TOR, a central controller of cell growth. *Cell* 103:253–262
  295. Meric-Bernstam F, Mills GB 2004 Mammalian target of rapamycin. *Semin Oncol* 31:10–17
  296. Cheson BD, Zwiebel JA, Dancey J, Murgo A 2000 Novel therapeutic agents for the treatment of myelodysplastic syndromes. *Semin Oncol* 27:560–577
  297. Turkson J, Zhang S, Palmer J, Kay H, Stanko J, Mora LB, Sehti S, Yu H, Jove R 2004 Inhibition of constitutive signal transducer and activator of transcription 3 activation by novel platinum complexes with potent antitumor activity. *Mol Cancer Ther* 3:1533–1542
  298. Sun J, Blaskovich MA, Jove R, Livingston SK, Coppola D, Sehti SM 2005 Cucurbitacin Q: a selective STAT3 activation inhibitor with potent antitumor activity. *Oncogene* 24:3236–3245
  299. Kuntzen C, Sonuc N, De Toni EN, Opelz C, Mucha SR, Gerbes AL, Eichhorst ST 2005 Inhibition of c-Jun-N-terminal-kinase sensitizes tumor cells to CD95-induced apoptosis and induces G2/M cell cycle arrest. *Cancer Res* 65:6780–6788
  300. Slamon DJ, Leyland-Jones B, Shak S, Fuchs H, Paton V, Bajamonde A, Fleming T, Eiermann W, Wolter J, Pegram M, Baselga J, Norton L 2001 Use of chemotherapy plus a monoclonal antibody against HER2 for metastatic breast cancer that overexpresses HER2. *N Engl J Med* 344:783–792
  301. Yano L, Shimura M, Taniguchi M, Hayashi Y, Suzuki T, Hatake K, Takaku F, Ishizaka Y 2000 Improved gene transfer to neuroblastoma cells by a monoclonal antibody targeting RET, a receptor tyrosine kinase. *Hum Gene Ther* 11:995–1004
  302. Drosten M, Frilling A, Stiewe T, Putzer BM 2002 A new therapeutic approach in medullary thyroid cancer treatment: inhibition of oncogenic RET signaling by adenoviral vector-mediated expression of a dominant-negative RET mutant. *Surgery* 132:991–997
  303. Drosten M, Stiewe T, Putzer BM 2003 Antitumor capacity of a dominant-negative RET proto-oncogene mutant in a medullary thyroid carcinoma model. *Hum Gene Ther* 14:971–982
  304. Parthasarathy R, Cote GJ, Gagel RF 1999 Hammerhead ribozyme-mediated inactivation of mutant RET in medullary thyroid carcinoma. *Cancer Res* 59:3911–3914
  305. Borkhardt A 2002 Blocking oncogenes in malignant cells by RNA interference—new hope for a highly specific cancer treatment? *Cancer Cell* 2:167–168

*Endocrine Reviews* is published by The Endocrine Society (<http://www.endo-society.org>), the foremost professional society serving the endocrine community.

#### American Society for Bone and Mineral Research (ASBMR)

28th Annual Meeting

September 15–19, 2006

Pennsylvania Convention Center

Philadelphia, Pennsylvania, USA

For more information, call (202) 367-1161, e-mail [asbmr@asbmr.org](mailto:asbmr@asbmr.org), or visit our web site [www.asbmr.org](http://www.asbmr.org)

#### Contemporary Diagnosis and Treatment of Vitamin D-Related Disorders

*A Scientific Meeting Sponsored by the American Society for Bone and Mineral Research*

December 4–5, 2006

Crystal Gateway Marriott

Arlington, Virginia, USA

Abstract Submission Deadline: September 1, 2006

For more information, call (202) 367-1161, e-mail [asbmr@asbmr.com](mailto:asbmr@asbmr.com), or visit our web site [www.asbmr.org](http://www.asbmr.org)

#### American Society for Bone and Mineral Research (ASBMR)

29th Annual Meeting

September 16–20, 2007

Honolulu Convention Center

Honolulu, Hawaii, USA

For more information, call (202) 367-1161, e-mail [asbmr@asbmr.org](mailto:asbmr@asbmr.org), or visit our web site [www.asbmr.org](http://www.asbmr.org)
